# Supplementary material for: Elephant-Initiated Interactions with Humans: Individual Differences and Specific Preferences in Captive African Elephants (Loxodonta africana)
Source: PubMed Central journal article supplement (PMC5408011; doi:10.3389/fvets.2017.00060), 2017-04-28
Supplement: data_sheet_1.pdf [file data_sheet_1.pdf]

| <b>Date</b> | <b>Time</b> | <b>Elephant</b> | <b>Behavior</b> | <b>Behavior group</b> | <b>Type of human</b> | <b>Specification</b> |
|-------------|-------------|-----------------|-----------------|-----------------------|----------------------|----------------------|
| 6/27/15     | 11:56       | Shungu          | Trunk out       | Trunk out             | G                    | A                    |
| 6/27/15     | 11:56       | Shungu          | Trunk out       | Trunk out             | T                    |                      |
| 6/27/15     | 12:25       | Thandi          | Head-lean       | Prolonged contact     | G                    | H                    |
| 6/27/15     | 13:00       | Sally           | Trunk out       | Trunk out             | G                    | D                    |
| 6/27/15     | 13:03       | Sally           | Trunk to body   | Trunk to human        | T                    |                      |
| 6/27/15     | 13:04       | Sally           | Trunk to foot   | Trunk to human        | G                    | Z                    |
| 6/27/15     | 13:14       | Keisha          | Trunk to body   | Trunk to human        | T                    |                      |
| 6/27/15     | 13:22       | Thato           | Trunk to hand   | Trunk to human        | T                    |                      |
| 6/27/15     | 13:36       | Keisha          | Trunk out       | Trunk out             | G                    | G                    |
| 6/28/15     | 11:25       | Thato           | Trunk to body   | Trunk to human        | T                    |                      |
| 6/28/15     | 11:25       | Thato           | Trunk to foot   | Trunk to human        | T                    |                      |
| 6/28/15     | 11:27       | Thato           | Trunk out       | Trunk out             | T                    |                      |
| 6/28/15     | 11:27       | Thato           | Trunk to foot   | Trunk to human        | T                    |                      |
| 6/28/15     | 11:29       | Thato           | Trunk out       | Trunk out             | T                    |                      |
| 6/28/15     | 11:30       | Thato           | Trunk to hand   | Trunk to human        | T                    |                      |
| 6/28/15     | 11:30       | Thato           | Trunk out       | Trunk out             | T                    |                      |
| 6/28/15     | 11:32       | Thato           | Trunk to hand   | Trunk to human        | T                    |                      |
| 6/28/15     | 11:39       | Thandi          | Trunk out       | Trunk out             | T                    |                      |
| 6/28/15     | 11:39       | Thandi          | Trunk out       | Trunk out             | T                    |                      |
| 6/28/15     | 11:39       | Thandi          | Trunk out       | Trunk out             | T                    |                      |
| 6/28/15     | 11:48       | Keisha          | Trunk out       | Trunk out             | G                    | D                    |
| 6/28/15     | 11:48       | Keisha          | Trunk to foot   | Trunk to human        | G                    | D                    |
| 6/28/15     | 11:54       | Shungu          | Trunk out       | Trunk out             | G                    | E                    |
| 6/28/15     | 11:54       | Thandi          | Approach        | Seeking out           | G                    | D                    |
| 6/28/15     | 11:54       | Nandi           | Trunk to hand   | Trunk to human        | G                    | H                    |
| 6/28/15     | 11:54       | Nandi           | Trunk to body   | Trunk to human        | G                    | H                    |
| 6/28/15     | 11:58       | Shungu          | Approach        | Seeking out           | G                    | E                    |
| 6/28/15     | 11:58       | Shungu          | Trunk to hand   | Trunk to human        | G                    | E                    |

|         |       |        |                         |                   |   |   |
|---------|-------|--------|-------------------------|-------------------|---|---|
| 6/28/15 | 12:01 | Keisha | Trunk to hand           | Trunk to human    | V |   |
| 6/28/15 | 12:01 | Keisha | Trunk out               | Trunk out         | G | D |
| 6/28/15 | 12:01 | Keisha | Trunk to body prolonged | Prolonged contact | T |   |
| 6/28/15 | 12:06 | Shungu | Trunk out               | Trunk out         | G | H |
| 6/28/15 | 12:06 | Shungu | Approach                | Seeking out       | G | H |
| 6/28/15 | 12:06 | Shungu | Head-lean               | Prolonged contact | G | H |
| 6/28/15 | 12:07 | Shungu | Trunk to leg            | Trunk to human    | V |   |
| 6/28/15 | 12:07 | Shungu | Trunk to hand           | Trunk to human    | V |   |
| 6/28/15 | 12:09 | Shungu | Trunk to hand           | Trunk to human    | T |   |
| 6/28/15 | 12:11 | Shungu | Trunk to hand           | Trunk to human    | T |   |
| 6/28/15 | 12:13 | Nandi  | Approach                | Seeking out       | G | D |
| 6/28/15 | 12:13 | Nandi  | Trunk out               | Trunk out         | G | D |
| 6/28/15 | 12:13 | Nandi  | Trunk to bullhook       | Trunk to object   | G | D |
| 6/28/15 | 12:16 | Thandi | Approach                | Seeking out       | G | H |
| 6/28/15 | 12:16 | Thandi | Head-lean               | Prolonged contact | G | H |
| 6/28/15 | 12:16 | Thandi | Trunk to bullhook       | Trunk to object   | G | H |
| 6/28/15 | 12:16 | Thandi | Trunk to hand           | Trunk to human    | G | H |
| 6/28/15 | 12:16 | Thandi | Trunk out               | Trunk out         | G | H |
| 6/28/15 | 12:16 | Thandi | Trunk to hand           | Trunk to human    | G | H |
| 6/28/15 | 12:17 | Nandi  | Trunk to leg            | Trunk to human    | G | J |
| 6/28/15 | 12:18 | Shungu | Trunk to hand           | Trunk to human    | T |   |
| 6/28/15 | 12:19 | Shungu | Trunk to hand           | Trunk to human    | G | E |
| 6/28/15 | 12:19 | Shungu | Trunk to hand           | Trunk to human    | V |   |
| 6/28/15 | 12:19 | Shungu | Trunk to arm            | Trunk to human    | V |   |
| 6/28/15 | 12:20 | Shungu | Trunk to hand           | Trunk to human    | V |   |
| 6/28/15 | 14:55 | Shungu | Trunk to hand           | Trunk to human    | G | E |
| 6/28/15 | 14:55 | Shungu | Trunk to body           | Trunk to human    | V |   |
| 6/28/15 | 14:55 | Shungu | Trunk to personal item  | Trunk to object   | V |   |
| 6/28/15 | 14:57 | Thandi | Trunk to bullhook       | Trunk to object   | G | J |

|         |       |         |                   |                   |   |   |
|---------|-------|---------|-------------------|-------------------|---|---|
| 6/28/15 | 15:01 | Thandi  | Trunk to hand     | Trunk to human    | G | H |
| 6/28/15 | 15:29 | Nandi   | Approach          | Seeking out       | G | K |
| 6/28/15 | 15:29 | Nandi   | Ears out          | Other             | G | K |
| 6/28/15 | 15:31 | Keisha  | Trunk to body     | Trunk to human    | G | K |
| 6/29/15 | 11:27 | Keisha  | Trunk out         | Trunk out         | G | C |
| 6/29/15 | 11:27 | Keisha  | Trunk out         | Trunk out         | G | H |
| 6/29/15 | 11:27 | Sally   | Trunk to body     | Trunk to human    | G | L |
| 6/29/15 | 11:27 | Sally   | Trunk to foot     | Trunk to human    | G | C |
| 6/29/15 | 11:34 | Sally   | Trunk to hand     | Trunk to human    | G | C |
| 6/29/15 | 11:34 | Sally   | Trunk to body     | Trunk to human    | G | C |
| 6/29/15 | 11:42 | Thandi  | Trunk to foot     | Trunk to human    | V |   |
| 6/29/15 | 11:42 | Thandi  | Trunk to leg      | Trunk to human    | V |   |
| 6/29/15 | 11:42 | Thandi  | Trunk out         | Trunk out         | V |   |
| 6/29/15 | 11:45 | Keisha  | Trunk to leg      | Trunk to human    | G | K |
| 6/29/15 | 11:45 | Thato   | Trunk to hand     | Trunk to human    | V |   |
| 6/29/15 | 11:48 | Keisha  | Trunk to body     | Trunk to human    | V |   |
| 6/29/15 | 11:52 | Nandi   | Trunk out         | Trunk out         | G | G |
| 6/29/15 | 11:53 | Shungu  | Approach          | Seeking out       | G | K |
| 6/29/15 | 11:56 | Thandi  | Trunk out         | Trunk out         | G | H |
| 6/29/15 | 11:59 | Shungu  | Head-lean         | Prolonged contact | G | L |
| 6/29/15 | 12:04 | Keisha  | Trunk to hand     | Trunk to human    | V |   |
| 6/29/15 | 12:05 | Nandi   | Trunk to bullhook | Trunk to object   | G | H |
| 6/30/15 | 9:44  | Mashudu | Trunk to hand     | Trunk to human    | V |   |
| 6/30/15 | 9:49  | Keisha  | Trunk to leg      | Trunk to human    | G | F |
| 6/30/15 | 9:50  | Keisha  | Trunk out         | Trunk out         | G | G |
| 6/30/15 | 10:04 | Keisha  | Approach          | Seeking out       | T |   |
| 6/30/15 | 10:25 | Keisha  | Trunk to hand     | Trunk to human    | G | F |
| 6/30/15 | 10:25 | Keisha  | Trunk to body     | Trunk to human    | G | F |
| 6/30/15 | 10:25 | Keisha  | Trunk out         | Trunk out         | G | F |

|         |       |         |                        |                   |   |   |
|---------|-------|---------|------------------------|-------------------|---|---|
| 6/30/15 | 11:27 | Keisha  | Trunk out              | Trunk out         | G | H |
| 6/30/15 | 11:28 | Thato   | Trunk to leg           | Trunk to human    | V |   |
| 6/30/15 | 11:33 | Keisha  | Trunk out              | Trunk out         | G | K |
| 6/30/15 | 11:34 | Shungu  | Trunk out              | Trunk out         | T |   |
| 6/30/15 | 11:47 | Keisha  | Trunk to body          | Trunk to human    | V |   |
| 6/30/15 | 11:47 | Keisha  | Trunk to hand          | Trunk to human    | V |   |
| 6/30/15 | 14:27 | Mashudu | Trunk to body          | Trunk to human    | G | H |
| 6/30/15 | 15:55 | Thandi  | Head-to                | Other             | G | A |
| 6/30/15 | 15:55 | Thandi  | Trunk to foot          | Trunk to human    | G | A |
| 6/30/15 | 15:56 | Thandi  | Trunk out              | Trunk out         | G | M |
| 6/30/15 | 15:56 | Mashudu | Trunk to personal item | Trunk to object   | V |   |
| 6/30/15 | 15:57 | Thandi  | Trunk to hand          | Trunk to human    | G | M |
| 6/30/15 | 15:57 | Keisha  | Head-to                | Other             | G | M |
| 6/30/15 | 15:57 | Keisha  | Head-lean              | Prolonged contact | G | M |
| 6/30/15 | 16:04 | Sally   | Trunk out              | Trunk out         | G | A |
| 7/1/15  | 8:59  | Keisha  | Approach               | Seeking out       | G | H |
| 7/1/15  | 9:22  | Thandi  | Approach               | Seeking out       | G | D |
| 7/1/15  | 9:22  | Thandi  | Trunk to body          | Trunk to human    | G | D |
| 7/1/15  | 9:54  | Keisha  | Trunk out              | Trunk out         | G | F |
| 7/1/15  | 9:54  | Keisha  | Trunk to bullhook      | Trunk to object   | G | F |
| 7/1/15  | 9:54  | Keisha  | Trunk to body          | Trunk to human    | T |   |
| 7/1/15  | 10:15 | Shungu  | Follow                 | Seeking out       | G | F |
| 7/1/15  | 10:15 | Shungu  | Trunk to body          | Trunk to human    | G | F |
| 7/1/15  | 10:26 | Keisha  | Trunk to body          | Trunk to human    | G | K |
| 7/1/15  | 10:26 | Thato   | Approach               | Seeking out       | G | A |
| 7/1/15  | 10:29 | Keisha  | Trunk out              | Trunk out         | G | K |
| 7/1/15  | 10:36 | Thandi  | Approach               | Seeking out       | G | L |
| 7/1/15  | 10:54 | Shungu  | Approach               | Seeking out       | G | H |
| 7/1/15  | 11:21 | Sally   | Trunk to body          | Trunk to human    | G | L |

|        |       |         |                        |                 |   |   |
|--------|-------|---------|------------------------|-----------------|---|---|
| 7/1/15 | 11:21 | Sally   | Trunk to hand          | Trunk to human  | G | L |
| 7/1/15 | 12:55 | Shungu  | Trunk to personal item | Trunk to object | T |   |
| 7/1/15 | 13:20 | Keisha  | Approach               | Seeking out     | G | F |
| 7/1/15 | 13:45 | Keisha  | Approach               | Seeking out     | G | F |
| 7/1/15 | 14:01 | Keisha  | Trunk to body          | Trunk to human  | G | F |
| 7/1/15 | 14:01 | Keisha  | Trunk to body          | Trunk to human  | T |   |
| 7/1/15 | 14:01 | Keisha  | Trunk out              | Trunk out       | G | F |
| 7/1/15 | 14:06 | Sally   | Trunk to body          | Trunk to human  | G | K |
| 7/1/15 | 14:06 | Sally   | Trunk to arm           | Trunk to human  | G | K |
| 7/1/15 | 14:08 | Sally   | Trunk to foot          | Trunk to human  | T |   |
| 7/1/15 | 14:08 | Sally   | Trunk to foot          | Trunk to human  | T |   |
| 7/1/15 | 14:44 | Nandi   | Face                   | Other           | G | F |
| 7/1/15 | 14:44 | Nandi   | Trunk to bullhook      | Trunk to object | G | F |
| 7/1/15 | 14:47 | Shungu  | Approach               | Seeking out     | V |   |
| 7/1/15 | 14:52 | Shungu  | Trunk out              | Trunk out       | G | K |
| 7/1/15 | 15:00 | Thandi  | Face                   | Other           | G | H |
| 7/1/15 | 15:00 | Shungu  | Approach               | Seeking out     | T |   |
| 7/1/15 | 15:00 | Shungu  | Trunk out              | Trunk out       | T |   |
| 7/2/15 | 10:48 | Mashudu | Trunk out              | Trunk out       | G | E |
| 7/2/15 | 10:53 | Keisha  | Trunk to body          | Trunk to human  | G | D |
| 7/2/15 | 11:17 | Thandi  | Approach               | Seeking out     | G | F |
| 7/2/15 | 11:32 | Sally   | Trunk to leg           | Trunk to human  | G | G |
| 7/2/15 | 11:45 | Shungu  | Approach               | Seeking out     | G | E |
| 7/2/15 | 11:45 | Shungu  | Trunk out              | Trunk out       | G | E |
| 7/2/15 | 14:33 | Mashudu | Approach               | Seeking out     | G | F |
| 7/2/15 | 14:33 | Mashudu | Trunk to hand          | Trunk to human  | G | F |
| 7/2/15 | 14:34 | Mashudu | Trunk to hand          | Trunk to human  | G | F |
| 7/2/15 | 14:34 | Mashudu | Trunk to leg           | Trunk to human  | G | F |
| 7/2/15 | 14:34 | Shungu  | Trunk to hand          | Trunk to human  | G | E |

|        |       |         |                        |                   |   |    |
|--------|-------|---------|------------------------|-------------------|---|----|
| 7/2/15 | 14:34 | Shungu  | Trunk to bullhook      | Trunk to object   | G | E  |
| 7/2/15 | 15:00 | Shungu  | Trunk to hand          | Trunk to human    | G | L  |
| 7/2/15 | 15:17 | Thato   | Trunk to hand          | Trunk to human    | T |    |
| 7/2/15 | 15:22 | Nandi   | Trunk to leg           | Trunk to human    | G | D  |
| 7/2/15 | 15:26 | Keisha  | Approach               | Seeking out       | G | L  |
| 7/2/15 | 15:26 | Keisha  | Head-lean              | Prolonged contact | G | L  |
| 7/2/15 | 15:59 | Thato   | Trunk out              | Trunk out         | G | D  |
| 7/2/15 | 15:59 | Keisha  | Trunk to hand          | Trunk to human    | G | L  |
| 7/2/15 | 16:02 | Keisha  | Trunk out              | Trunk out         | G | L  |
| 7/2/15 | 16:02 | Keisha  | Head-to                | Other             | G | L  |
| 7/2/15 | 16:02 | Keisha  | Trunk to hand          | Trunk to human    | G | L  |
| 7/2/15 | 16:09 | Keisha  | Approach               | Seeking out       | G | L  |
| 7/2/15 | 16:10 | Keisha  | Follow                 | Seeking out       | G | L  |
| 7/2/15 | 16:11 | Keisha  | Follow                 | Seeking out       | G | L  |
| 7/2/15 | 16:11 | Keisha  | Trunk to hand          | Trunk to human    | V | NR |
| 7/2/15 | 16:13 | Shungu  | Approach               | Seeking out       | G | K  |
| 7/2/15 | 16:13 | Shungu  | Approach               | Seeking out       | G | F  |
| 7/2/15 | 16:14 | Shungu  | Trunk to hand          | Trunk to human    | T |    |
| 7/2/15 | 16:20 | Shungu  | Approach               | Seeking out       | V |    |
| 7/2/15 | 16:23 | Shungu  | Trunk out              | Trunk out         | G | B  |
| 7/2/15 | 16:24 | Shungu  | Approach               | Seeking out       | V |    |
| 7/2/15 | 16:24 | Shungu  | Follow                 | Seeking out       | V |    |
| 7/2/15 | 16:24 | Shungu  | Trunk out              | Trunk out         | V |    |
| 7/2/15 | 16:24 | Shungu  | Trunk to hand          | Trunk to human    | V |    |
| 7/2/15 | 16:25 | Shungu  | Trunk out              | Trunk out         | T |    |
| 7/2/15 | 16:26 | Sally   | Trunk to personal item | Trunk to object   | T |    |
| 7/2/15 | 16:27 | Sally   | Trunk to leg           | Trunk to human    | G | H  |
| 7/2/15 | 16:28 | Sally   | Trunk to leg           | Trunk to human    | G | H  |
| 7/4/15 | 10:43 | Mashudu | Approach               | Seeking out       | G | E  |

|        |       |         |                        |                 |   |   |
|--------|-------|---------|------------------------|-----------------|---|---|
| 7/4/15 | 10:57 | Keisha  | Trunk to hand          | Trunk to human  | V |   |
| 7/4/15 | 10:57 | Keisha  | Trunk to personal item | Trunk to object | V |   |
| 7/4/15 | 10:57 | Mashudu | Trunk out              | Trunk out       | G | E |
| 7/4/15 | 11:04 | Sally   | Trunk to body          | Trunk to human  | T |   |
| 7/4/15 | 11:04 | Sally   | Trunk to body          | Trunk to human  | T |   |
| 7/4/15 | 11:05 | Thandi  | Approach               | Seeking out     | G | C |
| 7/4/15 | 11:09 | Sally   | Trunk out              | Trunk out       | G | L |
| 7/4/15 | 11:10 | Sally   | Approach               | Seeking out     | G | L |
| 7/4/15 | 11:13 | Thandi  | Ears out               | Other           | G | F |
| 7/4/15 | 11:21 | Shungu  | Trunk out              | Trunk out       | G | A |
| 7/4/15 | 11:21 | Shungu  | Trunk out              | Trunk out       | G | B |
| 7/4/15 | 11:21 | Shungu  | Head-to                | Other           | G | A |
| 7/4/15 | 11:28 | Shungu  | Trunk to bullhook      | Trunk to object | G | Z |
| 7/4/15 | 11:28 | Shungu  | Trunk out              | Trunk out       | G | Z |
| 7/4/15 | 11:29 | Shungu  | Trunk to leg           | Trunk to human  | G | Z |
| 7/4/15 | 11:29 | Shungu  | Trunk to body          | Trunk to human  | G | Z |
| 7/4/15 | 11:29 | Shungu  | Trunk out              | Trunk out       | G | Z |
| 7/4/15 | 11:31 | Thandi  | Trunk to bullhook      | Trunk to object | G | M |
| 7/4/15 | 11:33 | Shungu  | Approach               | Seeking out     | G | E |
| 7/4/15 | 11:33 | Shungu  | Follow                 | Seeking out     | G | E |
| 7/4/15 | 12:59 | Keisha  | Trunk to arm           | Trunk to human  | G | E |
| 7/4/15 | 12:59 | Keisha  | Trunk out              | Trunk out       | G | E |
| 7/4/15 | 14:04 | Shungu  | Trunk to hand          | Trunk to human  | T |   |
| 7/5/15 | 12:07 | Shungu  | Approach               | Seeking out     | V |   |
| 7/5/15 | 12:07 | Shungu  | Trunk to hand          | Trunk to human  | V |   |
| 7/5/15 | 12:07 | Shungu  | Trunk to body          | Trunk to human  | V |   |
| 7/5/15 | 12:24 | Sally   | Trunk to foot          | Trunk to human  | G | Z |
| 7/5/15 | 12:24 | Sally   | Trunk out              | Trunk out       | G | Z |
| 7/5/15 | 12:28 | Shungu  | Trunk out              | Trunk out       | V |   |

|        |       |         |                        |                 |   |   |
|--------|-------|---------|------------------------|-----------------|---|---|
| 7/5/15 | 12:40 | Sally   | Trunk to personal item | Trunk to object | T |   |
| 7/5/15 | 14:50 | Shungu  | Trunk to hand          | Trunk to human  | V |   |
| 7/5/15 | 14:54 | Shungu  | Trunk out              | Trunk out       | G | E |
| 7/5/15 | 15:02 | Nandi   | Trunk to leg           | Trunk to human  | G | F |
| 7/5/15 | 15:29 | Nandi   | Trunk out              | Trunk out       | G | E |
| 7/5/15 | 15:56 | Shungu  | Approach               | Seeking out     | G | A |
| 7/5/15 | 15:56 | Shungu  | Ear flap               | Other           | G | A |
| 7/6/15 | 9:05  | Sally   | Trunk to hand          | Trunk to human  | G | A |
| 7/6/15 | 9:05  | Sally   | Trunk out              | Trunk out       | G | A |
| 7/6/15 | 9:05  | Sally   | Trunk to body          | Trunk to human  | G | A |
| 7/6/15 | 9:10  | Nandi   | Trunk out              | Trunk out       | G | H |
| 7/6/15 | 10:34 | Shungu  | Trunk to hand          | Trunk to human  | G | K |
| 7/6/15 | 10:35 | Shungu  | Trunk out              | Trunk out       | G | K |
| 7/6/15 | 10:36 | Thato   | Approach               | Seeking out     | G | G |
| 7/6/15 | 10:37 | Keisha  | Trunk to body          | Trunk to human  | G | K |
| 7/6/15 | 10:37 | Keisha  | Trunk to hand          | Trunk to human  | G | K |
| 7/6/15 | 10:39 | Keisha  | Trunk to hand          | Trunk to human  | G | K |
| 7/6/15 | 10:40 | Sally   | Trunk out              | Trunk out       | G | E |
| 7/6/15 | 10:41 | Keisha  | Trunk to hand          | Trunk to human  | G | K |
| 7/6/15 | 10:49 | Shungu  | Approach               | Seeking out     | G | G |
| 7/6/15 | 11:00 | Shungu  | Trunk out              | Trunk out       | G | G |
| 7/6/15 | 11:03 | Mashudu | Trunk to body          | Trunk to human  | T |   |
| 7/6/15 | 11:07 | Shungu  | Trunk to foot          | Trunk to human  | G | C |
| 7/6/15 | 11:29 | Sally   | Trunk to leg           | Trunk to human  | G | G |
| 7/6/15 | 11:51 | Shungu  | Trunk to hand          | Trunk to human  | V |   |
| 7/6/15 | 11:59 | Shungu  | Trunk out              | Trunk out       | G | H |
| 7/6/15 | 12:00 | Sally   | Face                   | Other           | G | G |
| 7/6/15 | 12:39 | Keisha  | Trunk to leg           | Trunk to human  | T |   |
| 7/6/15 | 12:39 | Keisha  | Trunk out              | Trunk out       | T |   |



|        |       |         |                        |                 |   |   |
|--------|-------|---------|------------------------|-----------------|---|---|
| 7/6/15 | 14:43 | Mashudu | Trunk out              | Trunk out       | V |   |
| 7/6/15 | 15:06 | Keisha  | Trunk to hand          | Trunk to human  | G | E |
| 7/6/15 | 15:57 | Thandi  | Trunk out              | Trunk out       | G | H |
| 7/6/15 | 15:57 | Thandi  | Trunk to leg           | Trunk to human  | G | H |
| 7/6/15 | 16:26 | Shungu  | Trunk to personal item | Trunk to object | T |   |
| 7/6/15 | 16:26 | Shungu  | Approach               | Seeking out     | G | E |
| 7/6/15 | 16:27 | Thato   | Trunk out              | Trunk out       | G | C |
| 7/6/15 | 16:28 | Shungu  | Trunk to body          | Trunk to human  | T |   |
| 7/7/15 | 9:04  | Thandi  | Approach               | Seeking out     | G | L |
| 7/7/15 | 12:32 | Keisha  | Approach               | Seeking out     | G | G |
| 7/7/15 | 12:33 | Thandi  | Trunk out              | Trunk out       | G | H |
| 7/7/15 | 12:33 | Thandi  | Trunk to body          | Trunk to human  | G | H |
| 7/7/15 | 12:33 | Keisha  | Trunk out              | Trunk out       | T |   |
| 7/7/15 | 12:34 | Keisha  | Trunk out              | Trunk out       | T |   |
| 7/7/15 | 12:37 | Keisha  | Trunk out              | Trunk out       | T |   |
| 7/7/15 | 12:38 | Sally   | Trunk to leg           | Trunk to human  | G | Z |
| 7/7/15 | 12:58 | Keisha  | Approach               | Seeking out     | G | L |
| 7/7/15 | 13:26 | Keisha  | Trunk out              | Trunk out       | T |   |
| 7/7/15 | 13:29 | Keisha  | Trunk out              | Trunk out       | G | D |
| 7/7/15 | 13:38 | Shungu  | Trunk to body          | Trunk to human  | T |   |
| 7/7/15 | 13:53 | Shungu  | Trunk out              | Trunk out       | G | C |
| 7/7/15 | 13:53 | Shungu  | Trunk out              | Trunk out       | G | E |
| 7/7/15 | 13:59 | Thandi  | Trunk to hand          | Trunk to human  | G | G |
| 7/7/15 | 14:02 | Thandi  | Trunk to leg           | Trunk to human  | G | C |
| 7/7/15 | 14:28 | Thandi  | Trunk out              | Trunk out       | G | D |
| 7/7/15 | 14:29 | Keisha  | Trunk to arm           | Trunk to human  | G | C |
| 7/7/15 | 14:29 | Nandi   | Trunk to bullhook      | Trunk to object | G | B |
| 7/7/15 | 14:30 | Keisha  | Trunk to hand          | Trunk to human  | G | B |
| 7/7/15 | 14:30 | Keisha  | Trunk to hand          | Trunk to human  | T |   |

|        |       |        |               |                |   |   |
|--------|-------|--------|---------------|----------------|---|---|
| 7/7/15 | 15:32 | Shungu | Trunk out     | Trunk out      | V |   |
| 7/7/15 | 15:35 | Thandi | Trunk out     | Trunk out      | G | H |
| 7/7/15 | 15:35 | Thandi | Trunk to body | Trunk to human | G | H |
| 7/7/15 | 15:36 | Shungu | Trunk out     | Trunk out      | G | K |
| 7/7/15 | 15:36 | Keisha | Trunk out     | Trunk out      | G | H |
| 7/7/15 | 15:39 | Thato  | Trunk out     | Trunk out      | G | H |
| 7/7/15 | 15:49 | Sally  | Trunk to leg  | Trunk to human | G | D |
| 7/7/15 | 15:49 | Sally  | Trunk to body | Trunk to human | T |   |
| 7/7/15 | 16:27 | Nandi  | Trunk out     | Trunk out      | G | B |
| 7/7/15 | 16:27 | Nandi  | Trunk out     | Trunk out      | G | H |
| 7/7/15 | 16:28 | Sally  | Trunk out     | Trunk out      | G | H |
| 7/7/15 | 16:32 | Shungu | Trunk out     | Trunk out      | G | E |
| 7/8/15 | 11:24 | Thandi | Approach      | Seeking out    | G | H |
| 7/8/15 | 11:24 | Thandi | Trunk out     | Trunk out      | G | H |
| 7/8/15 | 11:30 | Thato  | Trunk to leg  | Trunk to human | G | E |
| 7/8/15 | 11:30 | Thato  | Trunk to hand | Trunk to human | G | E |
| 7/8/15 | 11:30 | Thato  | Trunk out     | Trunk out      | G | E |
| 7/8/15 | 11:30 | Shungu | Approach      | Seeking out    | G | E |
| 7/8/15 | 11:30 | Shungu | Trunk to hand | Trunk to human | G | E |
| 7/8/15 | 11:31 | Shungu | Face          | Other          | G | E |
| 7/8/15 | 11:31 | Shungu | Trunk to hand | Trunk to human | G | E |
| 7/8/15 | 11:32 | Shungu | Trunk to body | Trunk to human | G | E |
| 7/8/15 | 11:59 | Shungu | Trunk out     | Trunk out      | G | F |
| 7/8/15 | 12:03 | Shungu | Trunk out     | Trunk out      | G | F |
| 7/8/15 | 12:08 | Thandi | Trunk out     | Trunk out      | T |   |
| 7/8/15 | 12:08 | Thandi | Trunk out     | Trunk out      | G | F |
| 7/8/15 | 12:15 | Thandi | Trunk to leg  | Trunk to human | G | F |
| 7/8/15 | 12:16 | Sally  | Head-to       | Other          | G | F |
| 7/8/15 | 12:19 | Thato  | Trunk to body | Trunk to human | G | F |

|        |       |         |                   |                 |   |    |
|--------|-------|---------|-------------------|-----------------|---|----|
| 7/8/15 | 12:58 | Sally   | Trunk out         | Trunk out       | G | F  |
| 7/8/15 | 12:59 | Sally   | Trunk to leg      | Trunk to human  | G | F  |
| 7/8/15 | 13:53 | Shungu  | Approach          | Seeking out     | G | E  |
| 7/8/15 | 13:53 | Shungu  | Trunk out         | Trunk out       | G | E  |
| 7/8/15 | 13:55 | Shungu  | Face              | Other           | G | M  |
| 7/8/15 | 15:50 | Nandi   | Trunk to body     | Trunk to human  | G | K  |
| 7/8/15 | 15:55 | Thandi  | Trunk to leg      | Trunk to human  | G | K  |
| 7/8/15 | 16:02 | Sally   | Trunk to body     | Trunk to human  | T |    |
| 7/8/15 | 16:24 | Nandi   | Trunk to leg      | Trunk to human  | G | C  |
| 7/8/15 | 16:27 | Shungu  | Approach          | Seeking out     | G | F  |
| 7/8/15 | 16:27 | Shungu  | Trunk to hand     | Trunk to human  | G | F  |
| 7/8/15 | 16:28 | Keisha  | Trunk to body     | Trunk to human  | G | H  |
| 7/9/15 | 10:54 | Keisha  | Trunk to body     | Trunk to human  | T |    |
| 7/9/15 | 11:20 | Mashudu | Head-to           | Other           | G | F  |
| 7/9/15 | 11:32 | Shungu  | Trunk to hand     | Trunk to human  | T |    |
| 7/9/15 | 11:33 | Thandi  | Trunk out         | Trunk out       | G | C  |
| 7/9/15 | 11:34 | Keisha  | Face              | Other           | G | C  |
| 7/9/15 | 11:34 | Keisha  | Trunk to leg      | Trunk to human  | G | C  |
| 7/9/15 | 11:39 | Sally   | Trunk to hand     | Trunk to human  | G | NR |
| 7/9/15 | 12:06 | Sally   | Trunk to hand     | Trunk to human  | G | A  |
| 7/9/15 | 14:01 | Shungu  | Approach          | Seeking out     | G | D  |
| 7/9/15 | 14:29 | Nandi   | Trunk to bullhook | Trunk to object | G | H  |
| 7/9/15 | 14:29 | Nandi   | Trunk to body     | Trunk to human  | G | H  |
| 7/9/15 | 15:10 | Shungu  | Trunk out         | Trunk out       | G | M  |
| 7/9/15 | 15:16 | Keisha  | Trunk to hand     | Trunk to human  | G | A  |
| 7/9/15 | 15:16 | Keisha  | Trunk out         | Trunk out       | T |    |
| 7/9/15 | 15:21 | Thato   | Trunk to hand     | Trunk to human  | G | D  |
| 7/9/15 | 15:39 | Sally   | Trunk to leg      | Trunk to human  | G | F  |
| 7/9/15 | 15:39 | Sally   | Trunk to body     | Trunk to human  | G | F  |

|         |       |         |                         |                   |   |   |
|---------|-------|---------|-------------------------|-------------------|---|---|
| 7/9/15  | 15:49 | Thandi  | Approach                | Seeking out       | G | H |
| 7/9/15  | 15:49 | Thandi  | Trunk to body           | Trunk to human    | G | H |
| 7/9/15  | 15:52 | Mashudu | Trunk out               | Trunk out         | V |   |
| 7/9/15  | 16:12 | Thandi  | Approach                | Seeking out       | V |   |
| 7/12/15 | 10:21 | Thandi  | Approach                | Seeking out       | G | H |
| 7/12/15 | 10:21 | Thandi  | Trunk to body           | Trunk to human    | G | H |
| 7/12/15 | 11:21 | Mashudu | Trunk out               | Trunk out         | V |   |
| 7/12/15 | 11:52 | Thandi  | Approach                | Seeking out       | G | F |
| 7/12/15 | 14:20 | Keisha  | Trunk to leg            | Trunk to human    | G | E |
| 7/12/15 | 14:20 | Sally   | Trunk out               | Trunk out         | G | E |
| 7/12/15 | 14:23 | Shungu  | Approach                | Seeking out       | V |   |
| 7/12/15 | 14:23 | Shungu  | Trunk out               | Trunk out         | V |   |
| 7/12/15 | 14:26 | Thandi  | Trunk to body           | Trunk to human    | G | H |
| 7/12/15 | 14:27 | Mashudu | Trunk to hand           | Trunk to human    | T |   |
| 7/12/15 | 14:27 | Mashudu | Trunk to hand           | Trunk to human    | T |   |
| 7/12/15 | 14:33 | Shungu  | Trunk to leg            | Trunk to human    | G | Z |
| 7/12/15 | 14:34 | Keisha  | Trunk out               | Trunk out         | T |   |
| 7/12/15 | 14:34 | Keisha  | Trunk to leg            | Trunk to human    | T |   |
| 7/12/15 | 14:34 | Keisha  | Trunk out               | Trunk out         | T |   |
| 7/12/15 | 14:35 | Keisha  | Trunk to hand prolonged | Prolonged contact | T |   |
| 7/12/15 | 14:35 | Keisha  | Trunk to hand           | Trunk to human    | T |   |
| 7/12/15 | 14:35 | Keisha  | Trunk to bullhook       | Trunk to object   | G | L |
| 7/12/15 | 14:36 | Keisha  | Trunk out               | Trunk out         | G | H |
| 7/12/15 | 14:36 | Keisha  | Head-to                 | Other             | T |   |
| 7/12/15 | 14:39 | Mashudu | Trunk to hand           | Trunk to human    | V |   |
| 7/12/15 | 14:39 | Mashudu | Trunk to foot           | Trunk to human    | G | Z |
| 7/12/15 | 14:40 | Keisha  | Trunk to body           | Trunk to human    | V |   |
| 7/12/15 | 14:40 | Keisha  | Trunk to arm            | Trunk to human    | V |   |
| 7/12/15 | 14:41 | Keisha  | Trunk to body           | Trunk to human    | T |   |

|         |       |         |                   |                 |   |   |
|---------|-------|---------|-------------------|-----------------|---|---|
| 7/12/15 | 14:41 | Keisha  | Trunk out         | Trunk out       | T |   |
| 7/12/15 | 14:41 | Keisha  | Trunk to foot     | Trunk to human  | G | Z |
| 7/12/15 | 14:41 | Keisha  | Trunk to leg      | Trunk to human  | G | Z |
| 7/12/15 | 14:41 | Keisha  | Trunk to body     | Trunk to human  | G | Z |
| 7/12/15 | 14:41 | Thato   | Trunk to hand     | Trunk to human  | G | H |
| 7/12/15 | 14:41 | Thato   | Trunk to bullhook | Trunk to object | G | H |
| 7/12/15 | 14:44 | Keisha  | Trunk to hand     | Trunk to human  | T |   |
| 7/12/15 | 14:44 | Sally   | Trunk to body     | Trunk to human  | V |   |
| 7/12/15 | 14:44 | Sally   | Trunk to body     | Trunk to human  | T |   |
| 7/12/15 | 14:46 | Sally   | Trunk to foot     | Trunk to human  | T |   |
| 7/12/15 | 14:47 | Thandi  | Trunk to foot     | Trunk to human  | G | H |
| 7/12/15 | 14:48 | Thato   | Trunk to leg      | Trunk to human  | G | L |
| 7/12/15 | 14:48 | Keisha  | Trunk out         | Trunk out       | T |   |
| 7/12/15 | 14:49 | Mashudu | Trunk out         | Trunk out       | T |   |
| 7/12/15 | 14:49 | Mashudu | Trunk to hand     | Trunk to human  | G | L |
| 7/12/15 | 14:49 | Mashudu | Trunk to leg      | Trunk to human  | G | L |
| 7/12/15 | 14:49 | Mashudu | Trunk to body     | Trunk to human  | G | L |
| 7/12/15 | 15:28 | Sally   | Trunk out         | Trunk out       | G | K |
| 7/12/15 | 15:29 | Nandi   | Trunk out         | Trunk out       | G | H |
| 7/12/15 | 15:30 | Nandi   | Trunk to body     | Trunk to human  | T |   |
| 7/12/15 | 15:42 | Thandi  | Trunk out         | Trunk out       | G | L |
| 7/12/15 | 15:59 | Mashudu | Trunk to leg      | Trunk to human  | T |   |
| 7/12/15 | 15:59 | Mashudu | Trunk to foot     | Trunk to human  | T |   |
| 7/13/15 | 11:25 | Shungu  | Approach          | Seeking out     | G | A |
| 7/13/15 | 11:26 | Nandi   | Trunk out         | Trunk out       | G | L |
| 7/13/15 | 11:33 | Mashudu | Trunk to body     | Trunk to human  | G | F |
| 7/13/15 | 11:40 | Thandi  | Approach          | Seeking out     | G | F |
| 7/13/15 | 11:51 | Thandi  | Trunk out         | Trunk out       | G | F |
| 7/13/15 | 12:33 | Nandi   | Head-to           | Other           | G | F |

|         |       |         |                        |                 |   |   |
|---------|-------|---------|------------------------|-----------------|---|---|
| 7/13/15 | 12:33 | Nandi   | Trunk to body          | Trunk to human  | G | F |
| 7/13/15 | 12:38 | Nandi   | Trunk out              | Trunk out       | G | C |
| 7/13/15 | 12:49 | Shungu  | Approach               | Seeking out     | G | G |
| 7/13/15 | 12:50 | Thato   | Trunk to bullhook      | Trunk to object | G | F |
| 7/13/15 | 12:51 | Mashudu | Trunk to leg           | Trunk to human  | G | D |
| 7/13/15 | 12:57 | Mashudu | Approach               | Seeking out     | G | F |
| 7/13/15 | 12:57 | Mashudu | Trunk to leg           | Trunk to human  | G | D |
| 7/13/15 | 12:59 | Keisha  | Trunk to hand          | Trunk to human  | G | C |
| 7/13/15 | 13:09 | Thato   | Approach               | Seeking out     | V |   |
| 7/13/15 | 14:49 | Mashudu | Approach               | Seeking out     | G | F |
| 7/13/15 | 14:49 | Mashudu | Trunk to body          | Trunk to human  | G | F |
| 7/13/15 | 15:38 | Thandi  | Trunk to personal item | Trunk to object | G | M |
| 7/13/15 | 15:53 | Mashudu | Approach               | Seeking out     | G | E |
| 7/13/15 | 15:53 | Thato   | Trunk out              | Trunk out       | G | C |
| 7/13/15 | 15:55 | Sally   | Trunk to leg           | Trunk to human  | G | F |
| 7/13/15 | 15:56 | Keisha  | Trunk out              | Trunk out       | G | A |
| 7/13/15 | 15:58 | Nandi   | Trunk out              | Trunk out       | G | L |
| 7/13/15 | 16:23 | Nandi   | Trunk to leg           | Trunk to human  | G | B |
| 7/13/15 | 16:23 | Nandi   | Trunk to leg           | Trunk to human  | G | D |
| 7/13/15 | 16:25 | Sally   | Trunk to foot          | Trunk to human  | G | A |
| 7/13/15 | 16:25 | Nandi   | Trunk to bullhook      | Trunk to object | G | M |
| 7/13/15 | 16:28 | Sally   | Trunk out              | Trunk out       | T |   |
| 7/13/15 | 16:30 | Mashudu | Approach               | Seeking out     | G | G |
| 7/14/15 | 10:55 | Mashudu | Trunk out              | Trunk out       | V |   |
| 7/14/15 | 10:56 | Sally   | Trunk to body          | Trunk to human  | G | A |
| 7/14/15 | 10:57 | Thandi  | Trunk to bullhook      | Trunk to object | G | Z |
| 7/14/15 | 10:57 | Nandi   | Trunk out              | Trunk out       | G | D |
| 7/14/15 | 11:05 | Thandi  | Trunk to leg           | Trunk to human  | G | C |
| 7/14/15 | 11:05 | Thandi  | Approach               | Seeking out     | G | C |

|         |       |         |               |                |   |   |
|---------|-------|---------|---------------|----------------|---|---|
| 7/14/15 | 11:05 | Thandi  | Approach      | Seeking out    | G | E |
| 7/14/15 | 11:05 | Thandi  | Trunk to body | Trunk to human | G | E |
| 7/14/15 | 11:25 | Thato   | Trunk to body | Trunk to human | G | M |
| 7/14/15 | 12:02 | Thato   | Trunk to body | Trunk to human | G | F |
| 7/14/15 | 12:20 | Shungu  | Trunk out     | Trunk out      | G | E |
| 7/14/15 | 14:26 | Mashudu | Approach      | Seeking out    | G | D |
| 7/14/15 | 14:56 | Sally   | Trunk to body | Trunk to human | G | L |
| 7/14/15 | 15:00 | Mashudu | Trunk to body | Trunk to human | G | F |
| 7/14/15 | 15:01 | Shungu  | Trunk out     | Trunk out      | T |   |
| 7/14/15 | 15:05 | Nandi   | Trunk to leg  | Trunk to human | G | F |
| 7/14/15 | 15:18 | Nandi   | Approach      | Seeking out    | G | C |
| 7/14/15 | 15:18 | Nandi   | Trunk to foot | Trunk to human | G | C |
| 7/14/15 | 15:19 | Shungu  | Approach      | Seeking out    | G | D |
| 7/14/15 | 15:19 | Shungu  | Trunk out     | Trunk out      | G | D |
| 7/14/15 | 15:19 | Shungu  | Trunk out     | Trunk out      | G | M |
| 7/14/15 | 15:38 | Keisha  | Trunk out     | Trunk out      | G | K |
| 7/14/15 | 16:11 | Shungu  | Approach      | Seeking out    | G | E |
| 7/14/15 | 16:11 | Shungu  | Trunk to body | Trunk to human | G | E |
| 7/14/15 | 16:15 | Shungu  | Approach      | Seeking out    | G | E |
| 7/14/15 | 16:41 | Mashudu | Approach      | Seeking out    | V |   |
| 7/14/15 | 16:41 | Mashudu | Trunk out     | Trunk out      | V |   |
| 7/14/15 | 16:41 | Mashudu | Approach      | Seeking out    | V |   |
| 7/14/15 | 16:41 | Mashudu | Trunk to body | Trunk to human | V |   |
| 7/15/15 | 10:54 | Shungu  | Trunk to body | Trunk to human | G | M |
| 7/15/15 | 10:59 | Shungu  | Trunk to arm  | Trunk to human | G | M |
| 7/15/15 | 12:35 | Thandi  | Trunk to hand | Trunk to human | G | A |
| 7/15/15 | 12:57 | Sally   | Trunk out     | Trunk out      | G | Z |
| 7/15/15 | 13:03 | Sally   | Trunk to leg  | Trunk to human | G | Z |
| 7/15/15 | 13:35 | Keisha  | Trunk out     | Trunk out      | T |   |

|         |       |         |                        |                 |   |   |
|---------|-------|---------|------------------------|-----------------|---|---|
| 7/15/15 | 13:40 | Thato   | Trunk to hand          | Trunk to human  | G | D |
| 7/15/15 | 14:27 | Keisha  | Trunk out              | Trunk out       | T |   |
| 7/15/15 | 14:27 | Mashudu | Approach               | Seeking out     | G | M |
| 7/15/15 | 14:27 | Mashudu | Trunk to hand          | Trunk to human  | G | M |
| 7/15/15 | 14:33 | Nandi   | Trunk out              | Trunk out       | G | E |
| 7/15/15 | 14:38 | Sally   | Trunk out              | Trunk out       | G | E |
| 7/15/15 | 14:42 | Shungu  | Approach               | Seeking out     | V |   |
| 7/15/15 | 14:42 | Shungu  | Trunk to hand          | Trunk to human  | V |   |
| 7/15/15 | 14:42 | Shungu  | Trunk to hand          | Trunk to human  | T |   |
| 7/15/15 | 14:43 | Shungu  | Trunk to personal item | Trunk to object | G | B |
| 7/15/15 | 14:43 | Thato   | Approach               | Seeking out     | G | B |
| 7/15/15 | 14:43 | Thato   | Trunk to personal item | Trunk to object | G | B |
| 7/15/15 | 14:55 | Keisha  | Trunk out              | Trunk out       | T |   |
| 7/15/15 | 14:55 | Keisha  | Trunk out              | Trunk out       | G | H |
| 7/15/15 | 14:56 | Keisha  | Trunk to body          | Trunk to human  | T |   |
| 7/15/15 | 14:57 | Sally   | Trunk to foot          | Trunk to human  | T |   |
| 7/15/15 | 15:13 | Thato   | Trunk to leg           | Trunk to human  | T |   |
| 7/16/15 | 9:33  | Shungu  | Trunk to hand          | Trunk to human  | V |   |
| 7/16/15 | 9:33  | Shungu  | Trunk out              | Trunk out       | V |   |
| 7/16/15 | 9:33  | Shungu  | Approach               | Seeking out     | V |   |
| 7/16/15 | 9:33  | Shungu  | Trunk to hand          | Trunk to human  | V |   |
| 7/16/15 | 9:33  | Shungu  | Trunk out              | Trunk out       | V |   |
| 7/16/15 | 9:33  | Shungu  | Trunk to hand          | Trunk to human  | V |   |
| 7/16/15 | 9:33  | Shungu  | Trunk out              | Trunk out       | V |   |
| 7/16/15 | 9:34  | Shungu  | Follow                 | Seeking out     | V |   |
| 7/16/15 | 9:52  | Shungu  | Trunk to hand          | Trunk to human  | V |   |
| 7/16/15 | 10:17 | Keisha  | Trunk to hand          | Trunk to human  | G | E |
| 7/16/15 | 10:24 | Shungu  | Trunk to leg           | Trunk to human  | G | C |
| 7/16/15 | 10:25 | Thato   | Approach               | Seeking out     | V |   |



|         |       |        |                        |                   |   |   |
|---------|-------|--------|------------------------|-------------------|---|---|
| 7/16/15 | 10:25 | Thato  | Trunk to body          | Trunk to human    | V |   |
| 7/16/15 | 10:25 | Thato  | Trunk to hand          | Trunk to human    | G | C |
| 7/16/15 | 10:37 | Keisha | Trunk to foot          | Trunk to human    | G | E |
| 7/16/15 | 10:47 | Thato  | Approach               | Seeking out       | G | H |
| 7/16/15 | 10:47 | Thato  | Trunk to bullhook      | Trunk to object   | G | H |
| 7/16/15 | 10:47 | Thato  | Head-lean              | Prolonged contact | G | H |
| 7/16/15 | 10:48 | Thato  | Trunk to arm prolonged | Prolonged contact | V |   |
| 7/16/15 | 10:48 | Thato  | Trunk to leg           | Trunk to human    | V |   |
| 7/16/15 | 10:48 | Thato  | Trunk to head          | Trunk to human    | V |   |
| 7/16/15 | 10:48 | Thato  | Trunk to body          | Trunk to human    | V |   |
| 7/16/15 | 10:48 | Thato  | Trunk to head          | Trunk to human    | V |   |
| 7/16/15 | 10:48 | Thato  | Trunk to leg           | Trunk to human    | V |   |
| 7/16/15 | 10:49 | Thato  | Trunk to hand          | Trunk to human    | V |   |
| 7/16/15 | 10:49 | Thato  | Trunk to leg           | Trunk to human    | V |   |
| 7/16/15 | 10:49 | Thato  | Trunk to leg           | Trunk to human    | V |   |
| 7/16/15 | 10:50 | Thato  | Trunk to leg           | Trunk to human    | V |   |
| 7/16/15 | 10:50 | Thato  | Trunk to hand          | Trunk to human    | V |   |
| 7/16/15 | 10:52 | Thandi | Approach               | Seeking out       | G | H |
| 7/16/15 | 10:52 | Thandi | Trunk out              | Trunk out         | G | H |
| 7/16/15 | 11:01 | Keisha | Approach               | Seeking out       | V |   |
| 7/16/15 | 11:01 | Keisha | Trunk to hand          | Trunk to human    | V |   |
| 7/16/15 | 11:01 | Keisha | Trunk to body          | Trunk to human    | V |   |
| 7/16/15 | 11:01 | Keisha | Trunk out              | Trunk out         | G | L |
| 7/16/15 | 11:02 | Keisha | Trunk to hand          | Trunk to human    | G | M |
| 7/16/15 | 11:11 | Thato  | Approach               | Seeking out       | G | G |
| 7/16/15 | 11:21 | Shungu | Approach               | Seeking out       | G | E |
| 7/16/15 | 11:21 | Shungu | Trunk to body          | Trunk to human    | G | E |
| 7/16/15 | 11:21 | Shungu | Trunk out              | Trunk out         | G | E |
| 7/16/15 | 11:21 | Shungu | Face                   | Other             | G | E |

|         |       |         |               |                |   |   |
|---------|-------|---------|---------------|----------------|---|---|
| 7/16/15 | 11:21 | Shungu  | Follow        | Seeking out    | G | E |
| 7/16/15 | 11:21 | Shungu  | Trunk to hand | Trunk to human | V |   |
| 7/16/15 | 13:31 | Nandi   | Trunk to body | Trunk to human | G | E |
| 7/16/15 | 13:31 | Nandi   | Trunk out     | Trunk out      | G | E |
| 7/16/15 | 13:42 | Nandi   | Trunk out     | Trunk out      | T |   |
| 7/16/15 | 13:52 | Nandi   | Trunk to body | Trunk to human | G | L |
| 7/16/15 | 13:53 | Sally   | Trunk out     | Trunk out      | G | L |
| 7/16/15 | 13:54 | Sally   | Tail hit      | Other          | T |   |
| 7/16/15 | 14:17 | Shungu  | Trunk out     | Trunk out      | G | D |
| 7/16/15 | 14:18 | Mashudu | Trunk to hand | Trunk to human | V |   |
| 7/16/15 | 14:28 | Keisha  | Face          | Other          | G | E |
| 7/16/15 | 14:28 | Keisha  | Trunk to body | Trunk to human | G | E |
| 7/16/15 | 14:30 | Keisha  | Trunk out     | Trunk out      | G | E |
| 7/16/15 | 14:38 | Sally   | Trunk to body | Trunk to human | G | E |
| 7/16/15 | 15:30 | Shungu  | Trunk out     | Trunk out      | V |   |
| 7/16/15 | 15:49 | Thato   | Approach      | Seeking out    | G | E |
| 7/16/15 | 15:49 | Thato   | Trunk out     | Trunk out      | G | E |
| 7/17/15 | 15:26 | Shungu  | Approach      | Seeking out    | G | D |
| 7/17/15 | 15:26 | Shungu  | Trunk out     | Trunk out      | G | D |
| 7/17/15 | 15:26 | Shungu  | Trunk to leg  | Trunk to human | G | D |
| 7/17/15 | 15:26 | Mashudu | Trunk out     | Trunk out      | V |   |
| 7/17/15 | 15:27 | Thato   | Trunk to body | Trunk to human | G | H |
| 7/17/15 | 15:32 | Keisha  | Trunk out     | Trunk out      | T |   |
| 7/17/15 | 15:57 | Keisha  | Trunk out     | Trunk out      | G | E |
| 7/17/15 | 15:57 | Keisha  | Trunk out     | Trunk out      | T |   |
| 7/17/15 | 16:01 | Mashudu | Trunk to hand | Trunk to human | V |   |
| 7/17/15 | 16:01 | Mashudu | Trunk to hand | Trunk to human | V |   |
| 7/17/15 | 16:01 | Mashudu | Trunk out     | Trunk out      | V |   |
| 7/17/15 | 16:18 | Shungu  | Trunk to leg  | Trunk to human | G | F |

|         |       |         |                   |                   |   |   |
|---------|-------|---------|-------------------|-------------------|---|---|
| 7/17/15 | 16:23 | Mashudu | Approach          | Seeking out       | G | F |
| 7/17/15 | 16:23 | Mashudu | Trunk to hand     | Trunk to human    | G | F |
| 7/17/15 | 16:23 | Mashudu | Trunk to arm      | Trunk to human    | G | F |
| 7/17/15 | 16:23 | Mashudu | Trunk out         | Trunk out         | G | F |
| 7/17/15 | 16:24 | Mashudu | Approach          | Seeking out       | V |   |
| 7/18/15 | 8:35  | Mashudu | Trunk out         | Trunk out         | V |   |
| 7/18/15 | 8:35  | Mashudu | Trunk to arm      | Trunk to human    | G | K |
| 7/18/15 | 8:43  | Sally   | Head-to           | Other             | V |   |
| 7/18/15 | 8:43  | Sally   | Trunk to hand     | Trunk to human    | V |   |
| 7/20/15 | 9:06  | Mashudu | Trunk out         | Trunk out         | V |   |
| 7/20/15 | 9:10  | Thandi  | Trunk to foot     | Trunk to human    | G | L |
| 7/20/15 | 9:12  | Thandi  | Trunk out         | Trunk out         | G | A |
| 7/20/15 | 9:12  | Thandi  | Approach          | Seeking out       | G | A |
| 7/20/15 | 9:12  | Thandi  | Head-lean         | Prolonged contact | G | A |
| 7/20/15 | 13:17 | Thandi  | Trunk to body     | Trunk to human    | G | K |
| 7/20/15 | 13:37 | Thato   | Approach          | Seeking out       | G | B |
| 7/21/15 | 10:58 | Thandi  | Approach          | Seeking out       | G | H |
| 7/21/15 | 10:58 | Thandi  | Trunk to leg      | Trunk to human    | G | H |
| 7/21/15 | 11:03 | Thato   | Push              | Other             | G | D |
| 7/21/15 | 11:19 | Mashudu | Trunk to body     | Trunk to human    | G | F |
| 7/21/15 | 11:19 | Mashudu | Trunk to bullhook | Trunk to object   | G | F |
| 7/21/15 | 11:19 | Mashudu | Trunk to leg      | Trunk to human    | G | F |
| 7/21/15 | 11:19 | Mashudu | Trunk to leg      | Trunk to human    | G | F |
| 7/21/15 | 11:21 | Mashudu | Trunk out         | Trunk out         | G | F |
| 7/21/15 | 11:21 | Mashudu | Approach          | Seeking out       | V |   |
| 7/21/15 | 11:24 | Keisha  | Trunk out         | Trunk out         | G | F |
| 7/21/15 | 11:55 | Shungu  | Trunk out         | Trunk out         | T |   |
| 7/21/15 | 11:55 | Shungu  | Trunk out         | Trunk out         | T |   |
| 7/22/15 | 13:11 | Keisha  | Trunk to foot     | Trunk to human    | T |   |

|         |       |         |               |                |   |   |
|---------|-------|---------|---------------|----------------|---|---|
| 7/22/15 | 13:17 | Thato   | Trunk to hand | Trunk to human | T |   |
| 7/22/15 | 13:17 | Thato   | Trunk to arm  | Trunk to human | T |   |
| 7/22/15 | 13:21 | Nandi   | Trunk out     | Trunk out      | G | F |
| 7/22/15 | 13:36 | Thandi  | Trunk out     | Trunk out      | G | D |
| 7/22/15 | 13:57 | Keisha  | Trunk out     | Trunk out      | G | E |
| 7/22/15 | 13:57 | Keisha  | Trunk to body | Trunk to human | G | E |
| 7/22/15 | 13:59 | Keisha  | Approach      | Seeking out    | G | F |
| 7/22/15 | 13:59 | Keisha  | Trunk to body | Trunk to human | G | F |
| 7/22/15 | 14:26 | Nandi   | Trunk out     | Trunk out      | G | F |
| 7/22/15 | 14:29 | Sally   | Trunk to hand | Trunk to human | T |   |
| 7/22/15 | 14:29 | Sally   | Trunk to body | Trunk to human | T |   |
| 7/22/15 | 14:35 | Sally   | Trunk to body | Trunk to human | G | E |
| 7/22/15 | 14:35 | Sally   | Trunk to leg  | Trunk to human | G | E |
| 7/22/15 | 14:35 | Sally   | Trunk to body | Trunk to human | G | E |
| 7/22/15 | 14:40 | Mashudu | Trunk to hand | Trunk to human | T |   |
| 7/22/15 | 14:40 | Mashudu | Trunk to hand | Trunk to human | T |   |
| 7/22/15 | 14:40 | Mashudu | Trunk to leg  | Trunk to human | T |   |
| 7/22/15 | 14:44 | Thato   | Trunk to hand | Trunk to human | V |   |
| 7/22/15 | 15:19 | Nandi   | Approach      | Seeking out    | G | M |
| 7/22/15 | 15:19 | Nandi   | Trunk out     | Trunk out      | G | M |
| 7/22/15 | 16:16 | Mashudu | Trunk to body | Trunk to human | G | G |
| 7/22/15 | 16:16 | Thato   | Trunk to hand | Trunk to human | G | B |
| 7/22/15 | 16:18 | Shungu  | Approach      | Seeking out    | G | I |
| 7/22/15 | 16:18 | Sally   | Ears out      | Other          | G | B |
| 7/22/15 | 16:19 | Mashudu | Trunk out     | Trunk out      | G | F |
| 7/22/15 | 16:20 | Mashudu | Trunk to body | Trunk to human | T |   |
| 7/22/15 | 16:20 | Mashudu | Trunk to leg  | Trunk to human | G | F |
| 7/22/15 | 16:20 | Mashudu | Trunk to hand | Trunk to human | G | F |
| 7/22/15 | 16:21 | Mashudu | Trunk to hand | Trunk to human | G | F |

|         |       |         |               |                |   |   |
|---------|-------|---------|---------------|----------------|---|---|
| 7/22/15 | 16:21 | Shungu  | Approach      | Seeking out    | V |   |
| 7/22/15 | 16:21 | Shungu  | Trunk out     | Trunk out      | V |   |
| 7/22/15 | 16:21 | Shungu  | Approach      | Seeking out    | G | B |
| 7/23/15 | 10:33 | Mashudu | Trunk out     | Trunk out      | G | F |
| 7/23/15 | 10:36 | Thato   | Trunk out     | Trunk out      | V |   |
| 7/23/15 | 11:12 | Thandi  | Approach      | Seeking out    | G | E |
| 7/23/15 | 11:18 | Keisha  | Approach      | Seeking out    | G | C |
| 7/23/15 | 11:22 | Thato   | Approach      | Seeking out    | G | A |
| 7/23/15 | 11:24 | Thato   | Branch throw  | Other          | G | A |
| 7/23/15 | 11:32 | Mashudu | Trunk out     | Trunk out      | V |   |
| 7/23/15 | 12:11 | Sally   | Trunk to body | Trunk to human | G | Z |
| 7/23/15 | 12:11 | Sally   | Trunk to leg  | Trunk to human | T |   |
| 7/23/15 | 12:24 | Shungu  | Trunk to hand | Trunk to human | V |   |
| 7/23/15 | 14:21 | Keisha  | Trunk out     | Trunk out      | V |   |
| 7/23/15 | 14:24 | Nandi   | Trunk to hand | Trunk to human | G | M |
| 7/23/15 | 14:25 | Thandi  | Trunk out     | Trunk out      | G | M |
| 7/23/15 | 14:26 | Thato   | Trunk to hand | Trunk to human | V |   |
| 7/23/15 | 14:29 | Nandi   | Trunk out     | Trunk out      | G | B |
| 7/23/15 | 14:38 | Shungu  | Trunk out     | Trunk out      | G | E |
| 7/23/15 | 15:00 | Shungu  | Trunk out     | Trunk out      | V |   |
| 7/24/15 | 12:03 | Thato   | Approach      | Seeking out    | T |   |
| 7/24/15 | 12:16 | Thandi  | Head-to       | Other          | G | G |
| 7/24/15 | 12:34 | Mashudu | Trunk out     | Trunk out      | V |   |
| 7/24/15 | 13:00 | Shungu  | Trunk out     | Trunk out      | V |   |
| 7/24/15 | 13:38 | Keisha  | Trunk out     | Trunk out      | G | C |
| 7/24/15 | 13:53 | Shungu  | Trunk out     | Trunk out      | G | M |
| 7/24/15 | 13:53 | Shungu  | Trunk to body | Trunk to human | G | M |
| 7/24/15 | 13:53 | Shungu  | Trunk out     | Trunk out      | G | M |
| 7/24/15 | 14:23 | Shungu  | Trunk to leg  | Trunk to human | G | B |

|         |       |         |                        |                 |   |   |
|---------|-------|---------|------------------------|-----------------|---|---|
| 7/24/15 | 14:24 | Thato   | Trunk out              | Trunk out       | T |   |
| 7/24/15 | 15:02 | Sally   | Trunk to leg           | Trunk to human  | G | C |
| 7/24/15 | 16:04 | Sally   | Trunk to foot          | Trunk to human  | T |   |
| 7/24/15 | 16:06 | Sally   | Trunk to leg           | Trunk to human  | T |   |
| 7/24/15 | 16:06 | Sally   | Trunk to body          | Trunk to human  | T |   |
| 7/24/15 | 16:06 | Sally   | Trunk to leg           | Trunk to human  | T |   |
| 7/24/15 | 16:09 | Sally   | Trunk to leg           | Trunk to human  | T |   |
| 7/26/15 | 8:53  | Mashudu | Trunk out              | Trunk out       | V |   |
| 7/26/15 | 9:32  | Thandi  | Trunk out              | Trunk out       | T |   |
| 7/26/15 | 9:50  | Thandi  | Trunk to body          | Trunk to human  | G | E |
| 7/26/15 | 9:50  | Thandi  | Trunk to bullhook      | Trunk to object | G | E |
| 7/26/15 | 10:06 | Thato   | Approach               | Seeking out     | G | C |
| 7/26/15 | 10:12 | Thandi  | Trunk to head          | Trunk to human  | G | C |
| 7/26/15 | 10:37 | Sally   | Trunk out              | Trunk out       | G | M |
| 7/26/15 | 10:37 | Sally   | Trunk to leg           | Trunk to human  | G | H |
| 7/26/15 | 10:51 | Shungu  | Trunk out              | Trunk out       | G | K |
| 7/26/15 | 10:51 | Keisha  | Trunk out              | Trunk out       | G | E |
| 7/27/15 | 8:48  | Sally   | Trunk to personal item | Trunk to object | T |   |
| 7/27/15 | 8:48  | Sally   | Trunk to leg           | Trunk to human  | T |   |
| 7/27/15 | 8:50  | Thandi  | Trunk out              | Trunk out       | V |   |
| 7/27/15 | 8:50  | Thandi  | Trunk out              | Trunk out       | G | E |
| 7/27/15 | 8:54  | Thandi  | Approach               | Seeking out     | G | A |
| 7/27/15 | 9:17  | Mashudu | Trunk to hand          | Trunk to human  | V |   |
| 7/27/15 | 9:17  | Mashudu | Trunk to leg           | Trunk to human  | V |   |
| 7/27/15 | 13:56 | Sally   | Trunk out              | Trunk out       | G | I |
| 7/27/15 | 14:45 | Keisha  | Trunk out              | Trunk out       | G | Y |
| 7/27/15 | 15:19 | Thato   | Trunk out              | Trunk out       | V |   |
| 7/27/15 | 15:25 | Shungu  | Approach               | Seeking out     | V |   |
| 7/27/15 | 15:25 | Shungu  | Trunk to hand          | Trunk to human  | V |   |

|         |       |         |                        |                 |   |   |
|---------|-------|---------|------------------------|-----------------|---|---|
| 7/27/15 | 15:25 | Shungu  | Trunk to bullhook      | Trunk to object | G | D |
| 7/27/15 | 15:52 | Sally   | Trunk out              | Trunk out       | G | L |
| 7/27/15 | 15:52 | Keisha  | Trunk to body          | Trunk to human  | G | M |
| 7/27/15 | 15:56 | Sally   | Trunk out              | Trunk out       | T |   |
| 7/27/15 | 16:26 | Nandi   | Trunk out              | Trunk out       | G | I |
| 7/27/15 | 16:46 | Mashudu | Trunk out              | Trunk out       | V |   |
| 7/27/15 | 16:46 | Mashudu | Trunk to hand          | Trunk to human  | V |   |
| 7/27/15 | 16:46 | Mashudu | Trunk to body          | Trunk to human  | V |   |
| 7/27/15 | 16:46 | Mashudu | Trunk to hand          | Trunk to human  | V |   |
| 7/27/15 | 16:46 | Mashudu | Trunk to hand          | Trunk to human  | V |   |
| 7/29/15 | 10:15 | Keisha  | Approach               | Seeking out     | G | K |
| 7/29/15 | 10:31 | Nandi   | Trunk to leg           | Trunk to human  | G | L |
| 7/29/15 | 10:39 | Keisha  | Approach               | Seeking out     | G | F |
| 7/29/15 | 10:39 | Mashudu | Approach               | Seeking out     | G | C |
| 7/29/15 | 11:02 | Sally   | Trunk to body          | Trunk to human  | G | F |
| 7/29/15 | 11:24 | Nandi   | Approach               | Seeking out     | G | A |
| 7/29/15 | 11:24 | Thandi  | Trunk out              | Trunk out       | G | H |
| 7/29/15 | 11:24 | Thandi  | Trunk flick            | Other           | G | H |
| 7/29/15 | 11:24 | Thandi  | Trunk to body          | Trunk to human  | G | H |
| 7/29/15 | 11:24 | Thandi  | Follow                 | Seeking out     | G | H |
| 7/29/15 | 11:24 | Thandi  | Trunk out              | Trunk out       | G | H |
| 7/29/15 | 11:27 | Sally   | Trunk out              | Trunk out       | T |   |
| 7/29/15 | 11:27 | Sally   | Trunk to hand          | Trunk to human  | G | I |
| 7/29/15 | 11:27 | Sally   | Trunk to personal item | Trunk to object | T |   |
| 7/29/15 | 11:28 | Sally   | Trunk out              | Trunk out       | T |   |
| 7/29/15 | 11:33 | Sally   | Trunk out              | Trunk out       | G | I |
| 7/29/15 | 12:00 | Shungu  | Trunk to hand          | Trunk to human  | V |   |
| 7/29/15 | 12:11 | Shungu  | Approach               | Seeking out     | G | J |
| 7/29/15 | 13:23 | Keisha  | Approach               | Seeking out     | G | I |

|         |       |         |                   |                 |   |   |
|---------|-------|---------|-------------------|-----------------|---|---|
| 7/29/15 | 14:20 | Shungu  | Approach          | Seeking out     | G | F |
| 7/29/15 | 14:20 | Shungu  | Trunk to foot     | Trunk to human  | G | F |
| 7/29/15 | 14:20 | Shungu  | Trunk to hand     | Trunk to human  | V |   |
| 7/29/15 | 14:20 | Shungu  | Trunk to hand     | Trunk to human  | G | F |
| 7/29/15 | 15:27 | Thandi  | Head-to           | Other           | G | J |
| 7/29/15 | 15:38 | Thandi  | Face              | Other           | G | J |
| 7/29/15 | 15:38 | Thandi  | Trunk out         | Trunk out       | G | J |
| 7/29/15 | 15:41 | Thato   | Trunk out         | Trunk out       | G | C |
| 7/29/15 | 15:43 | Thato   | Trunk to bullhook | Trunk to object | G | C |
| 7/29/15 | 15:44 | Sally   | Approach          | Seeking out     | G | H |
| 7/29/15 | 15:44 | Sally   | Trunk out         | Trunk out       | G | H |
| 7/29/15 | 15:55 | Thato   | Approach          | Seeking out     | G | I |
| 7/29/15 | 16:09 | Mashudu | Approach          | Seeking out     | G | F |
| 7/29/15 | 16:13 | Mashudu | Approach          | Seeking out     | G | F |
| 7/31/15 | 11:26 | Keisha  | Trunk out         | Trunk out       | T |   |
| 7/31/15 | 11:26 | Shungu  | Trunk out         | Trunk out       | G | I |
| 7/31/15 | 11:34 | Mashudu | Trunk out         | Trunk out       | G | I |
| 7/31/15 | 11:42 | Thato   | Trunk to bullhook | Trunk to object | G | I |
| 7/31/15 | 11:46 | Shungu  | Trunk to hand     | Trunk to human  | V |   |
| 7/31/15 | 11:48 | Nandi   | Approach          | Seeking out     | G | D |
| 7/31/15 | 14:25 | Shungu  | Trunk to hand     | Trunk to human  | V |   |
| 7/31/15 | 14:25 | Shungu  | Trunk to hand     | Trunk to human  | V |   |
| 7/31/15 | 15:00 | Sally   | Trunk to hand     | Trunk to human  | V |   |
| 7/31/15 | 15:02 | Sally   | Trunk out         | Trunk out       | T |   |
| 7/31/15 | 15:08 | Keisha  | Trunk out         | Trunk out       | G | F |
| 7/31/15 | 15:22 | Shungu  | Trunk out         | Trunk out       | V |   |
| 7/31/15 | 15:22 | Shungu  | Trunk out         | Trunk out       | G | Z |
| 8/1/15  | 12:57 | Sally   | Trunk out         | Trunk out       | G | Z |
| 8/1/15  | 12:57 | Sally   | Trunk to leg      | Trunk to human  | G | Z |



|        |       |         |                        |                 |   |   |
|--------|-------|---------|------------------------|-----------------|---|---|
| 8/1/15 | 12:57 | Nandi   | Trunk to hand          | Trunk to human  | G | H |
| 8/1/15 | 13:00 | Keisha  | Trunk out              | Trunk out       | G | J |
| 8/1/15 | 13:00 | Keisha  | Trunk to leg           | Trunk to human  | G | J |
| 8/1/15 | 13:24 | Keisha  | Approach               | Seeking out     | G | L |
| 8/1/15 | 13:58 | Mashudu | Trunk out              | Trunk out       | V |   |
| 8/1/15 | 14:00 | Sally   | Trunk out              | Trunk out       | G | M |
| 8/1/15 | 14:21 | Shungu  | Approach               | Seeking out     | T |   |
| 8/1/15 | 14:21 | Shungu  | Trunk to hand          | Trunk to human  | T |   |
| 8/1/15 | 14:22 | Shungu  | Trunk to leg           | Trunk to human  | T |   |
| 8/1/15 | 14:30 | Sally   | Trunk to bullhook      | Trunk to object | G | F |
| 8/1/15 | 14:48 | Mashudu | Trunk to hand          | Trunk to human  | G | F |
| 8/1/15 | 15:03 | Sally   | Trunk out              | Trunk out       | T |   |
| 8/1/15 | 15:12 | Mashudu | Trunk to personal item | Trunk to object | G | Y |
| 8/1/15 | 15:17 | Keisha  | Trunk to hand          | Trunk to human  | T |   |
| 8/1/15 | 15:52 | Mashudu | Approach               | Seeking out     | G | I |
| 8/1/15 | 16:07 | Shungu  | Approach               | Seeking out     | G | M |
| 8/2/15 | 10:31 | Mashudu | Trunk out              | Trunk out       | T |   |
| 8/2/15 | 10:31 | Mashudu | Trunk to hand          | Trunk to human  | T |   |
| 8/2/15 | 10:32 | Keisha  | Trunk to leg           | Trunk to human  | T |   |
| 8/2/15 | 10:34 | Thandi  | Trunk out              | Trunk out       | G | F |
| 8/2/15 | 10:36 | Thandi  | Trunk flick            | Other           | G | F |
| 8/2/15 | 10:38 | Thato   | Trunk to hand          | Trunk to human  | G | M |
| 8/2/15 | 10:42 | Mashudu | Trunk out              | Trunk out       | G | F |
| 8/2/15 | 10:42 | Mashudu | Trunk to bullhook      | Trunk to object | G | F |
| 8/2/15 | 10:48 | Sally   | Trunk to body          | Trunk to human  | G | F |
| 8/2/15 | 11:27 | Shungu  | Trunk to leg           | Trunk to human  | G | E |
| 8/2/15 | 11:33 | Sally   | Trunk out              | Trunk out       | T |   |
| 8/2/15 | 11:33 | Sally   | Trunk out              | Trunk out       | T |   |
| 8/2/15 | 11:40 | Sally   | Trunk to personal item | Trunk to object | T |   |

|        |       |         |                   |                 |   |   |
|--------|-------|---------|-------------------|-----------------|---|---|
| 8/2/15 | 11:58 | Shungu  | Trunk out         | Trunk out       | G | B |
| 8/2/15 | 12:36 | Thandi  | Trunk to hand     | Trunk to human  | G | H |
| 8/2/15 | 12:58 | Keisha  | Trunk out         | Trunk out       | G | F |
| 8/2/15 | 13:05 | Sally   | Trunk to body     | Trunk to human  | G | F |
| 8/3/15 | 13:54 | Nandi   | Trunk out         | Trunk out       | G | E |
| 8/3/15 | 13:55 | Sally   | Trunk out         | Trunk out       | G | B |
| 8/3/15 | 13:56 | Sally   | Trunk to arm      | Trunk to human  | G | B |
| 8/3/15 | 14:24 | Shungu  | Approach          | Seeking out     | G | E |
| 8/3/15 | 14:24 | Shungu  | Trunk out         | Trunk out       | G | E |
| 8/3/15 | 15:27 | Shungu  | Approach          | Seeking out     | G | I |
| 8/4/15 | 8:34  | Shungu  | Approach          | Seeking out     | G | E |
| 8/4/15 | 9:28  | Thandi  | Trunk to body     | Trunk to human  | G | H |
| 8/4/15 | 9:31  | Thato   | Trunk to body     | Trunk to human  | G | I |
| 8/4/15 | 10:25 | Shungu  | Trunk to hand     | Trunk to human  | V |   |
| 8/4/15 | 10:25 | Mashudu | Trunk to hand     | Trunk to human  | V |   |
| 8/4/15 | 10:25 | Mashudu | Trunk to hand     | Trunk to human  | V |   |
| 8/4/15 | 10:35 | Keisha  | Trunk out         | Trunk out       | G | Y |
| 8/4/15 | 10:55 | Mashudu | Approach          | Seeking out     | G | H |
| 8/4/15 | 10:55 | Mashudu | Trunk out         | Trunk out       | G | H |
| 8/4/15 | 13:07 | Shungu  | Follow            | Seeking out     | G | E |
| 8/4/15 | 14:01 | Mashudu | Trunk out         | Trunk out       | G | J |
| 8/4/15 | 14:08 | Sally   | Trunk to bullhook | Trunk to object | G | B |
| 8/4/15 | 14:31 | Mashudu | Approach          | Seeking out     | G | I |
| 8/4/15 | 14:43 | Nandi   | Approach          | Seeking out     | G | M |
| 8/4/15 | 14:43 | Nandi   | Ears out          | Other           | G | M |
| 8/4/15 | 14:53 | Sally   | Trunk out         | Trunk out       | G | D |
| 8/4/15 | 15:07 | Thandi  | Approach          | Seeking out     | G | H |
| 8/4/15 | 15:07 | Thandi  | Trunk out         | Trunk out       | G | H |
| 8/5/15 | 12:55 | Keisha  | Trunk to body     | Trunk to human  | G | F |

|        |       |         |                        |                 |   |   |
|--------|-------|---------|------------------------|-----------------|---|---|
| 8/5/15 | 13:25 | Keisha  | Trunk out              | Trunk out       | G | I |
| 8/5/15 | 13:26 | Keisha  | Follow                 | Seeking out     | G | I |
| 8/5/15 | 13:26 | Keisha  | Trunk out              | Trunk out       | G | I |
| 8/5/15 | 15:57 | Mashudu | Trunk to leg           | Trunk to human  | V |   |
| 8/5/15 | 15:57 | Mashudu | Trunk to leg           | Trunk to human  | V |   |
| 8/5/15 | 15:57 | Mashudu | Trunk to leg           | Trunk to human  | V |   |
| 8/5/15 | 15:57 | Mashudu | Trunk out              | Trunk out       | V |   |
| 8/5/15 | 15:57 | Mashudu | Trunk to personal item | Trunk to object | V |   |
| 8/5/15 | 16:03 | Thandi  | Trunk to hand          | Trunk to human  | V |   |
| 8/6/15 | 9:58  | Shungu  | Approach               | Seeking out     | G | F |
| 8/6/15 | 10:00 | Shungu  | Approach               | Seeking out     | G | D |
| 8/6/15 | 10:00 | Keisha  | Approach               | Seeking out     | G | F |
| 8/6/15 | 10:00 | Shungu  | Approach               | Seeking out     | V |   |
| 8/6/15 | 10:55 | Shungu  | Trunk to leg           | Trunk to human  | T |   |
| 8/6/15 | 11:26 | Keisha  | Trunk out              | Trunk out       | G | Y |
| 8/6/15 | 11:26 | Keisha  | Trunk to hand          | Trunk to human  | G | Y |
| 8/6/15 | 11:28 | Keisha  | Trunk to hand          | Trunk to human  | G | I |
| 8/6/15 | 11:47 | Nandi   | Trunk to bullhook      | Trunk to object | G | I |
| 8/6/15 | 11:56 | Keisha  | Trunk out              | Trunk out       | G | J |
| 8/7/15 | 9:59  | Shungu  | Trunk out              | Trunk out       | G | B |
| 8/7/15 | 10:27 | Sally   | Trunk to bullhook      | Trunk to object | G | I |
| 8/7/15 | 10:27 | Sally   | Trunk out              | Trunk out       | G | I |
| 8/7/15 | 10:28 | Mashudu | Trunk out              | Trunk out       | T |   |
| 8/7/15 | 10:28 | Nandi   | Trunk out              | Trunk out       | G | H |
| 8/7/15 | 10:28 | Mashudu | Trunk to hand          | Trunk to human  | T |   |
| 8/7/15 | 10:28 | Sally   | Trunk out              | Trunk out       | G | I |
| 8/7/15 | 10:29 | Keisha  | Trunk to arm           | Trunk to human  | G | H |
| 8/7/15 | 10:29 | Keisha  | Trunk to foot          | Trunk to human  | V |   |
| 8/7/15 | 10:30 | Shungu  | Trunk to personal item | Trunk to object | G | I |

|        |       |         |                        |                 |   |   |
|--------|-------|---------|------------------------|-----------------|---|---|
| 8/7/15 | 10:31 | Keisha  | Trunk out              | Trunk out       | G | L |
| 8/7/15 | 10:32 | Sally   | Trunk to leg           | Trunk to human  | T |   |
| 8/7/15 | 10:32 | Mashudu | Trunk to arm           | Trunk to human  | G | I |
| 8/7/15 | 10:33 | Sally   | Trunk to foot          | Trunk to human  | T |   |
| 8/7/15 | 10:33 | Sally   | Trunk to bullhook      | Trunk to object | G | J |
| 8/7/15 | 10:36 | Sally   | Trunk to foot          | Trunk to human  | T |   |
| 8/7/15 | 10:36 | Keisha  | Trunk out              | Trunk out       | V |   |
| 8/7/15 | 10:37 | Keisha  | Trunk out              | Trunk out       | G | H |
| 8/7/15 | 10:38 | Thato   | Approach               | Seeking out     | V |   |
| 8/7/15 | 10:38 | Thato   | Trunk out              | Trunk out       | V |   |
| 8/7/15 | 10:41 | Nandi   | Trunk to personal item | Trunk to object | T |   |
| 8/7/15 | 10:42 | Keisha  | Trunk out              | Trunk out       | G | L |
| 8/7/15 | 10:42 | Keisha  | Trunk out              | Trunk out       | T |   |
| 8/7/15 | 10:42 | Keisha  | Trunk out              | Trunk out       | T |   |
| 8/7/15 | 10:44 | Keisha  | Trunk out              | Trunk out       | G | H |
| 8/7/15 | 10:45 | Keisha  | Head-to                | Other           | G | H |
| 8/7/15 | 10:45 | Keisha  | Trunk to foot          | Trunk to human  | T |   |
| 8/7/15 | 10:46 | Keisha  | Head-to                | Other           | G | H |
| 8/7/15 | 10:46 | Keisha  | Trunk to leg           | Trunk to human  | G | H |
| 8/7/15 | 10:46 | Shungu  | Approach               | Seeking out     | T |   |
| 8/7/15 | 10:46 | Shungu  | Approach               | Seeking out     | G | F |
| 8/7/15 | 10:47 | Keisha  | Head-to                | Other           | G | H |
| 8/7/15 | 10:47 | Keisha  | Approach               | Seeking out     | G | H |
| 8/7/15 | 10:48 | Shungu  | Trunk out              | Trunk out       | T |   |
| 8/7/15 | 10:50 | Keisha  | Trunk out              | Trunk out       | T |   |
| 8/7/15 | 10:51 | Keisha  | Trunk to body          | Trunk to human  | G | L |
| 8/8/15 | 9:56  | Keisha  | Trunk out              | Trunk out       | G | J |
| 8/8/15 | 10:13 | Thandi  | Trunk to hand          | Trunk to human  | G | H |
| 8/8/15 | 10:26 | Shungu  | Approach               | Seeking out     | G | L |

|        |       |         |               |                   |   |   |
|--------|-------|---------|---------------|-------------------|---|---|
| 8/8/15 | 10:26 | Shungu  | Trunk out     | Trunk out         | G | L |
| 8/8/15 | 10:27 | Shungu  | Trunk out     | Trunk out         | G | H |
| 8/8/15 | 10:27 | Shungu  | Trunk out     | Trunk out         | V |   |
| 8/8/15 | 11:17 | Mashudu | Trunk out     | Trunk out         | V |   |
| 8/8/15 | 11:27 | Mashudu | Trunk out     | Trunk out         | T |   |
| 8/8/15 | 11:30 | Keisha  | Trunk out     | Trunk out         | G | J |
| 8/8/15 | 11:30 | Keisha  | Trunk to foot | Trunk to human    | T |   |
| 8/8/15 | 11:30 | Keisha  | Trunk to hand | Trunk to human    | T |   |
| 8/8/15 | 11:32 | Shungu  | Trunk to hand | Trunk to human    | V |   |
| 8/8/15 | 11:39 | Thandi  | Approach      | Seeking out       | G | I |
| 8/8/15 | 11:39 | Thandi  | Head-lean     | Prolonged contact | G | I |
| 8/8/15 | 11:40 | Keisha  | Trunk to leg  | Trunk to human    | T |   |
| 8/8/15 | 11:44 | Sally   | Trunk to foot | Trunk to human    | T |   |
| 8/8/15 | 11:47 | Shungu  | Approach      | Seeking out       | G | A |
| 8/8/15 | 11:47 | Shungu  | Trunk to hand | Trunk to human    | T |   |
| 8/8/15 | 12:03 | Mashudu | Trunk to hand | Trunk to human    | T |   |
| 8/8/15 | 12:06 | Mashudu | Trunk out     | Trunk out         | V |   |
| 8/8/15 | 12:06 | Mashudu | Trunk to foot | Trunk to human    | T |   |
| 8/8/15 | 12:14 | Shungu  | Approach      | Seeking out       | G | H |
| 8/8/15 | 12:16 | Shungu  | Follow        | Seeking out       | G | H |
| 8/8/15 | 12:18 | Shungu  | Follow        | Seeking out       | G | H |
| 8/8/15 | 12:28 | Keisha  | Approach      | Seeking out       | G | L |
| 8/8/15 | 12:28 | Keisha  | Trunk out     | Trunk out         | G | L |
| 8/8/15 | 12:41 | Sally   | Trunk out     | Trunk out         | G | H |
| 8/8/15 | 12:44 | Thandi  | Trunk to hand | Trunk to human    | G | H |
| 8/8/15 | 12:57 | Sally   | Trunk out     | Trunk out         | G | E |
| 8/8/15 | 15:51 | Thandi  | Approach      | Seeking out       | G | H |
| 8/8/15 | 15:51 | Thandi  | Trunk to body | Trunk to human    | G | H |
| 8/8/15 | 16:35 | Nandi   | Approach      | Seeking out       | G | H |

|        |       |         |                         |                   |   |   |
|--------|-------|---------|-------------------------|-------------------|---|---|
| 8/8/15 | 16:35 | Nandi   | Trunk out               | Trunk out         | G | H |
| 8/9/15 | 11:38 | Thato   | Approach                | Seeking out       | G | Y |
| 8/9/15 | 11:38 | Thato   | Head-lean               | Prolonged contact | G | Y |
| 8/9/15 | 11:41 | Thato   | Trunk to leg            | Trunk to human    | G | E |
| 8/9/15 | 11:41 | Thato   | Trunk out               | Trunk out         | T |   |
| 8/9/15 | 11:48 | Sally   | Trunk to leg            | Trunk to human    | T |   |
| 8/9/15 | 11:52 | Thato   | Trunk out               | Trunk out         | T |   |
| 8/9/15 | 12:11 | Mashudu | Trunk to body           | Trunk to human    | T |   |
| 8/9/15 | 12:21 | Thandi  | Trunk to body           | Trunk to human    | G | F |
| 8/9/15 | 12:21 | Thandi  | Trunk to bullhook       | Trunk to object   | G | F |
| 8/9/15 | 12:34 | Thato   | Trunk to hand           | Trunk to human    | G | D |
| 8/9/15 | 12:34 | Thato   | Trunk out               | Trunk out         | T |   |
| 8/9/15 | 12:34 | Thato   | Trunk out               | Trunk out         | G | D |
| 8/9/15 | 12:37 | Keisha  | Trunk to body           | Trunk to human    | T |   |
| 8/9/15 | 12:39 | Keisha  | Trunk out               | Trunk out         | T |   |
| 8/9/15 | 12:42 | Thato   | Trunk to body prolonged | Prolonged contact | G | Y |
| 8/9/15 | 12:42 | Thandi  | Trunk to leg            | Trunk to human    | G | Y |
| 8/9/15 | 12:45 | Thato   | Approach                | Seeking out       | G | A |
| 8/9/15 | 12:47 | Thato   | Approach                | Seeking out       | G | Y |
| 8/9/15 | 12:47 | Thato   | Trunk to head           | Trunk to human    | G | Y |
| 8/9/15 | 12:47 | Thato   | Trunk to body prolonged | Prolonged contact | G | Y |
| 8/9/15 | 13:43 | Thato   | Trunk to leg            | Trunk to human    | T |   |
| 8/9/15 | 14:35 | Mashudu | Trunk to hand           | Trunk to human    | V |   |
| 8/9/15 | 14:37 | Mashudu | Trunk to hand           | Trunk to human    | G | I |
| 8/9/15 | 14:42 | Keisha  | Trunk to leg            | Trunk to human    | G | I |
| 8/9/15 | 14:42 | Keisha  | Trunk to body           | Trunk to human    | G | I |
| 8/9/15 | 15:05 | Nandi   | Approach                | Seeking out       | G | F |
| 8/9/15 | 15:06 | Nandi   | Trunk out               | Trunk out         | G | F |
| 8/9/15 | 15:30 | Shungu  | Trunk out               | Trunk out         | G | E |

|         |       |         |                         |                   |   |   |
|---------|-------|---------|-------------------------|-------------------|---|---|
| 8/9/15  | 15:31 | Shungu  | Trunk to leg            | Trunk to human    | T |   |
| 8/9/15  | 15:31 | Shungu  | Trunk to body           | Trunk to human    | T |   |
| 8/9/15  | 15:33 | Sally   | Trunk to leg            | Trunk to human    | T |   |
| 8/9/15  | 15:34 | Shungu  | Trunk to hand           | Trunk to human    | T |   |
| 8/9/15  | 15:43 | Thato   | Trunk to leg            | Trunk to human    | T |   |
| 8/9/15  | 15:43 | Thato   | Trunk to hand           | Trunk to human    | T |   |
| 8/9/15  | 15:55 | Thandi  | Trunk to cane           | Trunk to object   | G | D |
| 8/9/15  | 15:56 | Thandi  | Trunk out               | Trunk out         | G | I |
| 8/9/15  | 15:57 | Nandi   | Trunk to personal item  | Trunk to object   | V |   |
| 8/9/15  | 15:59 | Mashudu | Trunk out               | Trunk out         | V |   |
| 8/9/15  | 15:59 | Mashudu | Trunk to hand           | Trunk to human    | V |   |
| 8/9/15  | 16:17 | Nandi   | Trunk out               | Trunk out         | G | I |
| 8/10/15 | 9:07  | Mashudu | Trunk out               | Trunk out         | V |   |
| 8/10/15 | 9:35  | Mashudu | Trunk out               | Trunk out         | G | F |
| 8/10/15 | 9:35  | Mashudu | Approach                | Seeking out       | G | F |
| 8/10/15 | 9:43  | Thandi  | Trunk to leg            | Trunk to human    | G | F |
| 8/10/15 | 9:45  | Thato   | Trunk out               | Trunk out         | G | F |
| 8/10/15 | 9:47  | Shungu  | Approach                | Seeking out       | G | F |
| 8/10/15 | 9:47  | Shungu  | Trunk out               | Trunk out         | G | F |
| 8/10/15 | 9:47  | Shungu  | Trunk out               | Trunk out         | G | J |
| 8/10/15 | 10:01 | Thato   | Trunk to arm prolonged  | Prolonged contact | T |   |
| 8/10/15 | 10:05 | Sally   | Trunk to foot           | Trunk to human    | T |   |
| 8/10/15 | 10:05 | Sally   | Trunk to personal item  | Trunk to object   | T |   |
| 8/10/15 | 10:05 | Sally   | Trunk to leg            | Trunk to human    | G | F |
| 8/10/15 | 12:09 | Mashudu | Trunk out               | Trunk out         | T |   |
| 8/10/15 | 12:12 | Sally   | Trunk to bullhook       | Trunk to object   | G | H |
| 8/10/15 | 12:13 | Thato   | Trunk to hand prolonged | Prolonged contact | T |   |
| 8/10/15 | 12:14 | Mashudu | Trunk out               | Trunk out         | T |   |
| 8/10/15 | 12:14 | Sally   | Trunk out               | Trunk out         | G | H |

|         |       |         |                        |                 |   |    |
|---------|-------|---------|------------------------|-----------------|---|----|
| 8/10/15 | 12:26 | Thandi  | Trunk out              | Trunk out       | G | H  |
| 8/10/15 | 12:45 | Thandi  | Trunk to body          | Trunk to human  | G | A  |
| 8/10/15 | 13:29 | Shungu  | Approach               | Seeking out     | G | E  |
| 8/10/15 | 13:29 | Shungu  | Trunk out              | Trunk out       | G | E  |
| 8/10/15 | 14:55 | Nandi   | Trunk out              | Trunk out       | G | F  |
| 8/10/15 | 14:55 | Sally   | Trunk out              | Trunk out       | G | F  |
| 8/10/15 | 14:55 | Sally   | Trunk to hand          | Trunk to human  | G | F  |
| 8/10/15 | 14:57 | Thandi  | Trunk out              | Trunk out       | G | H  |
| 8/10/15 | 14:57 | Sally   | Trunk to leg           | Trunk to human  | T |    |
| 8/10/15 | 14:58 | Nandi   | Trunk out              | Trunk out       | G | J  |
| 8/10/15 | 15:24 | Thato   | Trunk out              | Trunk out       | T |    |
| 8/10/15 | 15:57 | Thandi  | Trunk to leg           | Trunk to human  | G | J  |
| 8/10/15 | 16:12 | Mashudu | Approach               | Seeking out     | G | F  |
| 8/10/15 | 16:15 | Mashudu | Approach               | Seeking out     | G | F  |
| 8/10/15 | 16:15 | Mashudu | Trunk out              | Trunk out       | G | F  |
| 8/10/15 | 16:28 | Mashudu | Approach               | Seeking out     | V |    |
| 8/10/15 | 16:28 | Mashudu | Trunk to hand          | Trunk to human  | V |    |
| 8/10/15 | 16:28 | Mashudu | Trunk to hand          | Trunk to human  | V | NR |
| 8/10/15 | 16:28 | Mashudu | Trunk to leg           | Trunk to human  | V |    |
| 8/10/15 | 16:28 | Mashudu | Trunk to arm           | Trunk to human  | V |    |
| 8/10/15 | 16:40 | Thato   | Trunk out              | Trunk out       | G | B  |
| 8/10/15 | 16:41 | Shungu  | Approach               | Seeking out     | G | D  |
| 8/10/15 | 16:41 | Shungu  | Trunk to personal item | Trunk to object | V |    |
| 8/11/15 | 8:48  | Sally   | Trunk out              | Trunk out       | T |    |
| 8/11/15 | 8:48  | Sally   | Trunk to foot          | Trunk to human  | T |    |
| 8/11/15 | 8:50  | Keisha  | Trunk out              | Trunk out       | V |    |
| 8/11/15 | 8:53  | Sally   | Trunk to personal item | Trunk to object | T |    |
| 8/11/15 | 8:53  | Keisha  | Trunk to hand          | Trunk to human  | G | A  |
| 8/11/15 | 8:58  | Shungu  | Trunk out              | Trunk out       | T |    |



|         |       |         |                        |                 |   |   |
|---------|-------|---------|------------------------|-----------------|---|---|
| 8/11/15 | 9:02  | Thandi  | Trunk to bullhook      | Trunk to object | G | I |
| 8/11/15 | 9:03  | Keisha  | Face                   | Other           | G | I |
| 8/11/15 | 10:14 | Thandi  | Approach               | Seeking out     | G | H |
| 8/11/15 | 10:14 | Thandi  | Trunk to body          | Trunk to human  | G | H |
| 8/11/15 | 10:16 | Thandi  | Trunk to personal item | Trunk to object | G | H |
| 8/11/15 | 10:18 | Thandi  | Trunk out              | Trunk out       | G | H |
| 8/11/15 | 10:18 | Nandi   | Trunk to body          | Trunk to human  | G | H |
| 8/11/15 | 10:18 | Thandi  | Trunk to personal item | Trunk to object | G | H |
| 8/11/15 | 10:18 | Thandi  | Trunk to hand          | Trunk to human  | G | H |
| 8/11/15 | 12:31 | Thandi  | Trunk to body          | Trunk to human  | G | H |
| 8/11/15 | 12:31 | Thandi  | Trunk out              | Trunk out       | G | H |
| 8/11/15 | 12:32 | Sally   | Trunk out              | Trunk out       | G | I |
| 8/11/15 | 12:34 | Sally   | Trunk to leg           | Trunk to human  | T |   |
| 8/11/15 | 12:36 | Thandi  | Trunk to body          | Trunk to human  | G | H |
| 8/11/15 | 12:36 | Nandi   | Trunk out              | Trunk out       | T |   |
| 8/11/15 | 12:36 | Thandi  | Approach               | Seeking out     | G | H |
| 8/11/15 | 12:38 | Sally   | Trunk out              | Trunk out       | G | E |
| 8/11/15 | 12:38 | Thandi  | Head-to                | Other           | G | H |
| 8/11/15 | 12:40 | Keisha  | Trunk to hand          | Trunk to human  | G | I |
| 8/11/15 | 12:44 | Thandi  | Trunk hit              | Other           | T |   |
| 8/11/15 | 12:46 | Keisha  | Head-to                | Other           | G | I |
| 8/11/15 | 12:55 | Shungu  | Trunk to body          | Trunk to human  | V |   |
| 8/11/15 | 14:30 | Shungu  | Approach               | Seeking out     | V |   |
| 8/11/15 | 14:30 | Shungu  | Trunk out              | Trunk out       | V |   |
| 8/11/15 | 14:51 | Keisha  | Trunk to personal item | Trunk to object | T |   |
| 8/11/15 | 15:15 | Mashudu | Trunk to personal item | Trunk to object | V |   |
| 8/11/15 | 15:50 | Thandi  | Approach               | Seeking out     | G | E |
| 8/11/15 | 16:42 | Thandi  | Approach               | Seeking out     | G | H |
| 8/11/15 | 16:42 | Thandi  | Trunk out              | Trunk out       | G | H |

|         |       |         |                   |                 |   |   |
|---------|-------|---------|-------------------|-----------------|---|---|
| 8/12/15 | 9:51  | Mashudu | Trunk out         | Trunk out       | V |   |
| 8/12/15 | 9:57  | Thato   | Trunk to bullhook | Trunk to object | G | I |
| 8/12/15 | 15:58 | Keisha  | Approach          | Seeking out     | G | J |
| 8/12/15 | 16:14 | Shungu  | Trunk out         | Trunk out       | G | J |
| 8/12/15 | 16:33 | Thandi  | Trunk out         | Trunk out       | G | E |
| 8/12/15 | 16:33 | Thandi  | Trunk to foot     | Trunk to human  | G | E |
| 8/12/15 | 16:34 | Nandi   | Trunk out         | Trunk out       | G | E |
| 8/12/15 | 16:34 | Nandi   | Trunk to leg      | Trunk to human  | G | E |
| 8/12/15 | 16:38 | Mashudu | Trunk out         | Trunk out       | G | J |
| 8/14/15 | 10:24 | Mashudu | Approach          | Seeking out     | G | F |
| 8/14/15 | 10:24 | Mashudu | Trunk out         | Trunk out       | G | F |
| 8/14/15 | 10:26 | Shungu  | Trunk out         | Trunk out       | T |   |
| 8/14/15 | 10:26 | Shungu  | Trunk out         | Trunk out       | T |   |
| 8/14/15 | 10:29 | Mashudu | Trunk out         | Trunk out       | G | F |
| 8/15/15 | 9:52  | Keisha  | Trunk out         | Trunk out       | G | F |
| 8/15/15 | 9:52  | Keisha  | Trunk to leg      | Trunk to human  | T |   |
| 8/15/15 | 10:31 | Mashudu | Trunk to hand     | Trunk to human  | G | Y |
| 8/15/15 | 14:26 | Mashudu | Kick              | Other           | V |   |
| 8/15/15 | 14:59 | Sally   | Trunk out         | Trunk out       | G | F |
| 8/15/15 | 14:59 | Mashudu | Trunk out         | Trunk out       | G | F |
| 8/15/15 | 15:30 | Shungu  | Trunk to hand     | Trunk to human  | V |   |
| 8/15/15 | 15:30 | Shungu  | Trunk out         | Trunk out       | V |   |
| 8/15/15 | 15:32 | Shungu  | Trunk to bullhook | Trunk to object | G | F |
| 8/15/15 | 15:32 | Keisha  | Trunk to body     | Trunk to human  | T |   |
| 8/15/15 | 15:34 | Shungu  | Approach          | Seeking out     | G | E |
| 8/15/15 | 15:34 | Shungu  | Trunk out         | Trunk out       | G | E |
| 8/16/15 | 10:18 | Shungu  | Approach          | Seeking out     | G | L |
| 8/16/15 | 10:18 | Shungu  | Trunk out         | Trunk out       | G | L |
| 8/16/15 | 10:18 | Thato   | Approach          | Seeking out     | G | L |

|         |       |         |                        |                 |   |   |
|---------|-------|---------|------------------------|-----------------|---|---|
| 8/16/15 | 10:21 | Mashudu | Approach               | Seeking out     | G | L |
| 8/16/15 | 10:21 | Mashudu | Trunk to personal item | Trunk to object | V |   |
| 8/16/15 | 10:21 | Mashudu | Other                  | Other           | V |   |
| 8/16/15 | 10:57 | Nandi   | Trunk out              | Trunk out       | G | E |
| 8/16/15 | 11:00 | Thato   | Trunk to bullhook      | Trunk to object | G | E |
| 8/16/15 | 11:04 | Thato   | Push                   | Other           | T |   |
| 8/16/15 | 11:07 | Thandi  | Trunk out              | Trunk out       | G | A |
| 8/16/15 | 11:07 | Thandi  | Trunk out              | Trunk out       | G | H |
| 8/16/15 | 11:09 | Nandi   | Trunk out              | Trunk out       | G | A |
| 8/16/15 | 11:10 | Thandi  | Trunk out              | Trunk out       | G | Y |
| 8/16/15 | 11:10 | Sally   | Trunk to foot          | Trunk to human  | G | Y |
| 8/16/15 | 11:10 | Mashudu | Trunk to leg           | Trunk to human  | G | F |
| 8/16/15 | 11:17 | Thandi  | Trunk out              | Trunk out       | G | F |
| 8/16/15 | 11:18 | Sally   | Trunk to foot          | Trunk to human  | T |   |
| 8/16/15 | 11:19 | Nandi   | Trunk out              | Trunk out       | G | Y |
| 8/16/15 | 11:19 | Nandi   | Trunk to foot          | Trunk to human  | G | Y |
| 8/16/15 | 11:19 | Nandi   | Trunk out              | Trunk out       | G | F |
| 8/16/15 | 11:30 | Keisha  | Trunk out              | Trunk out       | T |   |
| 8/16/15 | 14:05 | Shungu  | Trunk to hand          | Trunk to human  | T |   |
| 8/16/15 | 14:28 | Sally   | Trunk to hand          | Trunk to human  | G | I |
| 8/16/15 | 14:32 | Mashudu | Trunk to hand          | Trunk to human  | G | F |
| 8/16/15 | 14:35 | Mashudu | Trunk out              | Trunk out       | V |   |
| 8/16/15 | 14:35 | Mashudu | Trunk to hand          | Trunk to human  | V |   |
| 8/16/15 | 14:57 | Shungu  | Trunk out              | Trunk out       | G | E |
| 8/16/15 | 14:58 | Shungu  | Trunk out              | Trunk out       | T |   |
| 8/16/15 | 14:58 | Shungu  | Trunk out              | Trunk out       | G | H |
| 8/17/15 | 10:31 | Sally   | Trunk out              | Trunk out       | G | E |
| 8/17/15 | 10:31 | Keisha  | Trunk to leg           | Trunk to human  | G | Y |
| 8/17/15 | 10:33 | Sally   | Trunk to bullhook      | Trunk to object | G | E |

|         |       |         |                         |                   |   |   |
|---------|-------|---------|-------------------------|-------------------|---|---|
| 8/17/15 | 12:26 | Shungu  | Trunk to arm            | Trunk to human    | V |   |
| 8/17/15 | 15:14 | Shungu  | Trunk out               | Trunk out         | G | Y |
| 8/17/15 | 15:26 | Sally   | Trunk to hand           | Trunk to human    | G | E |
| 8/17/15 | 15:41 | Sally   | Trunk to leg            | Trunk to human    | T |   |
| 8/17/15 | 15:41 | Sally   | Trunk to hand           | Trunk to human    | T |   |
| 8/17/15 | 15:42 | Sally   | Trunk out               | Trunk out         | G | E |
| 8/17/15 | 15:42 | Sally   | Trunk to hand           | Trunk to human    | G | E |
| 8/17/15 | 15:47 | Sally   | Trunk to bullhook       | Trunk to object   | G | E |
| 8/17/15 | 15:47 | Sally   | Trunk to hand           | Trunk to human    | G | E |
| 8/17/15 | 15:49 | Sally   | Trunk to bullhook       | Trunk to object   | G | E |
| 8/17/15 | 15:54 | Shungu  | Trunk out               | Trunk out         | G | H |
| 8/17/15 | 15:57 | Nandi   | Trunk to body           | Trunk to human    | G | H |
| 8/17/15 | 15:58 | Nandi   | Trunk out               | Trunk out         | G | F |
| 8/17/15 | 16:00 | Mashudu | Trunk to hand           | Trunk to human    | V |   |
| 8/17/15 | 16:18 | Thandi  | Approach                | Seeking out       | G | H |
| 8/17/15 | 16:18 | Thandi  | Trunk to body           | Trunk to human    | G | H |
| 8/18/15 | 9:22  | Nandi   | Trunk out               | Trunk out         | G | F |
| 8/18/15 | 9:29  | Nandi   | Approach                | Seeking out       | G | F |
| 8/18/15 | 9:29  | Nandi   | Trunk out               | Trunk out         | G | F |
| 8/18/15 | 9:30  | Nandi   | Trunk to leg            | Trunk to human    | G | F |
| 8/18/15 | 9:41  | Thato   | Trunk out               | Trunk out         | G | J |
| 8/18/15 | 9:41  | Thato   | Trunk to body           | Trunk to human    | G | J |
| 8/18/15 | 9:41  | Thato   | Trunk to personal item  | Trunk to object   | G | J |
| 8/18/15 | 9:42  | Thandi  | Trunk out               | Trunk out         | G | F |
| 8/18/15 | 9:44  | Shungu  | Trunk to body           | Trunk to human    | G | E |
| 8/18/15 | 9:44  | Thato   | Approach                | Seeking out       | V |   |
| 8/18/15 | 9:44  | Thato   | Trunk to hand prolonged | Prolonged contact | V |   |
| 8/18/15 | 9:44  | Thato   | Trunk to body prolonged | Prolonged contact | G | L |
| 8/18/15 | 9:47  | Thato   | Trunk to arm prolonged  | Prolonged contact | G | L |

|         |       |         |                        |                   |   |   |
|---------|-------|---------|------------------------|-------------------|---|---|
| 8/18/15 | 9:47  | Sally   | Trunk to leg           | Trunk to human    | G | J |
| 8/18/15 | 9:47  | Thandi  | Trunk to leg           | Trunk to human    | G | J |
| 8/18/15 | 9:46  | Thandi  | Trunk out              | Trunk out         | G | J |
| 8/18/15 | 9:47  | Nandi   | Trunk out              | Trunk out         | G | F |
| 8/18/15 | 9:47  | Thato   | Trunk out              | Trunk out         | G | E |
| 8/18/15 | 9:47  | Mashudu | Approach               | Seeking out       | G | I |
| 8/18/15 | 9:47  | Mashudu | Head-lean              | Prolonged contact | G | I |
| 8/18/15 | 9:48  | Thandi  | Trunk to bullhook      | Trunk to object   | G | E |
| 8/18/15 | 9:49  | Thandi  | Trunk out              | Trunk out         | G | L |
| 8/18/15 | 9:49  | Thandi  | Trunk out              | Trunk out         | G | E |
| 8/18/15 | 9:50  | Mashudu | Trunk to personal item | Trunk to object   | V |   |
| 8/18/15 | 9:50  | Shungu  | Trunk out              | Trunk out         | V |   |
| 8/18/15 | 9:51  | Shungu  | Trunk to hand          | Trunk to human    | V |   |
| 8/18/15 | 12:19 | Shungu  | Approach               | Seeking out       | G | E |
| 8/18/15 | 12:53 | Keisha  | Approach               | Seeking out       | G | I |
| 8/18/15 | 14:18 | Nandi   | Approach               | Seeking out       | G | A |
| 8/18/15 | 14:28 | Mashudu | Approach               | Seeking out       | G | E |
| 8/18/15 | 15:06 | Thato   | Push                   | Other             | G | I |
| 8/18/15 | 15:36 | Shungu  | Trunk out              | Trunk out         | V |   |
| 8/19/15 | 8:41  | Thato   | Trunk out              | Trunk out         | T |   |
| 8/19/15 | 9:38  | Mashudu | Trunk out              | Trunk out         | G | F |
| 8/19/15 | 9:38  | Mashudu | Trunk out              | Trunk out         | G | F |
| 8/19/15 | 9:41  | Shungu  | Approach               | Seeking out       | G | F |
| 8/19/15 | 9:41  | Shungu  | Trunk to hand          | Trunk to human    | G | F |
| 8/19/15 | 9:44  | Shungu  | Trunk to hand          | Trunk to human    | G | F |
| 8/19/15 | 9:44  | Nandi   | Approach               | Seeking out       | G | F |
| 8/19/15 | 9:44  | Nandi   | Trunk to body          | Trunk to human    | G | F |
| 8/19/15 | 9:52  | Keisha  | Trunk out              | Trunk out         | T |   |
| 8/19/15 | 11:56 | Thandi  | Approach               | Seeking out       | G | H |

|         |       |         |                        |                   |   |   |
|---------|-------|---------|------------------------|-------------------|---|---|
| 8/19/15 | 11:56 | Thandi  | Hug                    | Prolonged contact | G | H |
| 8/19/15 | 12:33 | Nandi   | Trunk to leg           | Trunk to human    | G | L |
| 8/19/15 | 12:34 | Shungu  | Approach               | Seeking out       | G | H |
| 8/19/15 | 12:34 | Shungu  | Trunk to leg           | Trunk to human    | G | H |
| 8/19/15 | 12:34 | Shungu  | Trunk to hand          | Trunk to human    | V |   |
| 8/19/15 | 12:34 | Keisha  | Trunk to hand          | Trunk to human    | G | H |
| 8/19/15 | 12:34 | Shungu  | Trunk to leg           | Trunk to human    | G |   |
| 8/19/15 | 12:51 | Nandi   | Trunk to hand          | Trunk to human    | G | H |
| 8/19/15 | 12:58 | Keisha  | Trunk to body          | Trunk to human    | G | F |
| 8/19/15 | 12:59 | Keisha  | Approach               | Seeking out       | G | H |
| 8/19/15 | 13:00 | Thandi  | Trunk to leg           | Trunk to human    | G | F |
| 8/19/15 | 13:00 | Thandi  | Trunk to bullhook      | Trunk to object   | G | F |
| 8/19/15 | 13:02 | Nandi   | Trunk to personal item | Trunk to object   | V |   |
| 8/19/15 | 13:50 | Mashudu | Trunk out              | Trunk out         | T |   |
| 8/20/15 | 10:57 | Keisha  | Face                   | Other             | G | H |
| 8/20/15 | 10:57 | Keisha  | Trunk to body          | Trunk to human    | G | H |
| 8/20/15 | 10:57 | Keisha  | Trunk to personal item | Trunk to object   | V |   |
| 8/21/15 | 9:06  | Shungu  | Trunk out              | Trunk out         | T |   |
| 8/21/15 | 9:50  | Nandi   | Trunk to leg           | Trunk to human    | G | E |
| 8/21/15 | 9:50  | Nandi   | Trunk to body          | Trunk to human    | G | E |
| 8/21/15 | 9:50  | Mashudu | Trunk out              | Trunk out         | G | I |
| 8/21/15 | 9:53  | Keisha  | Trunk to body          | Trunk to human    | V |   |
| 8/21/15 | 9:53  | Keisha  | Trunk to body          | Trunk to human    | V |   |
| 8/21/15 | 9:53  | Keisha  | Trunk to body          | Trunk to human    | V |   |
| 8/21/15 | 9:54  | Keisha  | Approach               | Seeking out       | G | I |
| 8/21/15 | 9:54  | Keisha  | Trunk to body          | Trunk to human    | G | I |
| 8/21/15 | 9:54  | Keisha  | Trunk to leg           | Trunk to human    | G | I |
| 8/21/15 | 9:54  | Keisha  | Trunk out              | Trunk out         | V |   |
| 8/21/15 | 9:54  | Keisha  | Trunk to hand          | Trunk to human    | V |   |

|         |       |         |                   |                   |   |   |
|---------|-------|---------|-------------------|-------------------|---|---|
| 8/21/15 | 9:56  | Keisha  | Head-lean         | Prolonged contact | G | I |
| 8/21/15 | 10:27 | Shungu  | Trunk to arm      | Trunk to human    | V |   |
| 8/21/15 | 10:30 | Sally   | Trunk out         | Trunk out         | T |   |
| 8/21/15 | 12:28 | Thandi  | Approach          | Seeking out       | G | H |
| 8/21/15 | 12:28 | Thandi  | Trunk to hand     | Trunk to human    | G | H |
| 8/21/15 | 12:30 | Mashudu | Approach          | Seeking out       | G | H |
| 8/21/15 | 12:30 | Mashudu | Trunk out         | Trunk out         | G | H |
| 8/21/15 | 12:54 | Keisha  | Head-to           | Other             | G | Y |
| 8/21/15 | 13:20 | Thato   | Approach          | Seeking out       | G | I |
| 8/21/15 | 13:20 | Thato   | Trunk to body     | Trunk to human    | G | I |
| 8/21/15 | 14:50 | Mashudu | Approach          | Seeking out       | G | J |
| 8/21/15 | 14:58 | Shungu  | Trunk out         | Trunk out         | G | Y |
| 8/21/15 | 15:24 | Thandi  | Trunk to hand     | Trunk to human    | G | I |
| 8/21/15 | 15:54 | Shungu  | Trunk out         | Trunk out         | G | E |
| 8/21/15 | 15:57 | Nandi   | Trunk to body     | Trunk to human    | V |   |
| 8/21/15 | 15:57 | Nandi   | Face              | Other             | G | I |
| 8/21/15 | 16:19 | Shungu  | Trunk to arm      | Trunk to human    | G | H |
| 8/21/15 | 16:20 | Keisha  | Approach          | Seeking out       | G | I |
| 8/21/15 | 16:20 | Keisha  | Trunk out         | Trunk out         | G | I |
| 8/22/15 | 14:55 | Nandi   | Approach          | Seeking out       | G | F |
| 8/22/15 | 15:17 | Shungu  | Trunk to hand     | Trunk to human    | G | I |
| 8/22/15 | 15:17 | Shungu  | Trunk to leg      | Trunk to human    | V |   |
| 8/22/15 | 15:17 | Shungu  | Trunk to bullhook | Trunk to object   | G | I |
| 8/22/15 | 15:29 | Keisha  | Ear flap          | Other             | T |   |
| 8/22/15 | 15:36 | Keisha  | Trunk out         | Trunk out         | G | I |
| 8/22/15 | 15:57 | Keisha  | Trunk out         | Trunk out         | G | C |
| 8/22/15 | 15:58 | Mashudu | Trunk out         | Trunk out         | G | I |
| 8/22/15 | 16:18 | Nandi   | Trunk out         | Trunk out         | G | I |
| 8/23/15 | 11:29 | Sally   | Trunk to leg      | Trunk to human    | T |   |

|         |       |         |                        |                 |   |   |
|---------|-------|---------|------------------------|-----------------|---|---|
| 8/23/15 | 11:31 | Keisha  | Trunk to personal item | Trunk to object | T |   |
| 8/23/15 | 11:32 | Thato   | Trunk out              | Trunk out       | G | H |
| 8/23/15 | 12:03 | Sally   | Head-to                | Other           | G | J |
| 8/23/15 | 12:05 | Shungu  | Trunk out              | Trunk out       | T |   |
| 8/23/15 | 12:32 | Shungu  | Trunk out              | Trunk out       | G | F |
| 8/23/15 | 12:57 | Sally   | Trunk to arm           | Trunk to human  | V |   |
| 8/23/15 | 12:57 | Sally   | Trunk to leg           | Trunk to human  | V |   |
| 8/23/15 | 12:59 | Sally   | Head-to                | Other           | G | H |
| 8/23/15 | 13:08 | Mashudu | Trunk out              | Trunk out       | G | F |
| 8/23/15 | 13:22 | Shungu  | Trunk out              | Trunk out       | G | H |
| 8/23/15 | 13:38 | Shungu  | Trunk to hand          | Trunk to human  | T |   |
| 8/23/15 | 13:50 | Mashudu | Trunk to leg           | Trunk to human  | V |   |
| 8/23/15 | 13:50 | Mashudu | Trunk to hand          | Trunk to human  | V |   |
| 8/23/15 | 13:50 | Mashudu | Trunk to personal item | Trunk to object | V |   |
| 8/23/15 | 13:50 | Mashudu | Trunk to hand          | Trunk to human  | V |   |
| 8/23/15 | 13:50 | Mashudu | Trunk to leg           | Trunk to human  | G | I |
| 8/23/15 | 15:48 | Thandi  | Trunk out              | Trunk out       | G | Y |
| 8/23/15 | 15:52 | Keisha  | Trunk to leg           | Trunk to human  | G | Y |
| 8/23/15 | 16:02 | Thandi  | Approach               | Seeking out     | G | H |
| 8/23/15 | 16:02 | Thandi  | Trunk to body          | Trunk to human  | G | H |
| 8/23/15 | 16:02 | Thandi  | Trunk out              | Trunk out       | G | F |
| 8/23/15 | 16:02 | Nandi   | Trunk out              | Trunk out       | T |   |
| 8/23/15 | 16:05 | Shungu  | Trunk to head          | Trunk to human  | T |   |
| 8/23/15 | 16:05 | Shungu  | Trunk to body          | Trunk to human  | T |   |
| 8/23/15 | 16:06 | Keisha  | Trunk to body          | Trunk to human  | G | F |
| 8/23/15 | 16:06 | Sally   | Trunk to body          | Trunk to human  | G | F |
| 8/23/15 | 16:07 | Sally   | Trunk to leg           | Trunk to human  | G | F |
| 8/23/15 | 16:07 | Sally   | Trunk to body          | Trunk to human  | G | F |
| 8/23/15 | 16:07 | Sally   | Trunk to hand          | Trunk to human  | T |   |



|         |       |         |               |                |   |   |
|---------|-------|---------|---------------|----------------|---|---|
| 8/23/15 | 16:08 | Thandi  | Trunk to body | Trunk to human | G | H |
| 8/23/15 | 16:08 | Nandi   | Trunk out     | Trunk out      | G | H |
| 8/23/15 | 16:09 | Nandi   | Approach      | Seeking out    | G | I |
| 8/23/15 | 16:09 | Nandi   | Trunk to foot | Trunk to human | G | I |
| 8/23/15 | 16:10 | Shungu  | Trunk to body | Trunk to human | G | I |
| 8/23/15 | 16:11 | Keisha  | Head-to       | Other          | G | C |
| 8/23/15 | 16:12 | Keisha  | Trunk out     | Trunk out      | T |   |
| 8/23/15 | 16:12 | Keisha  | Trunk to hand | Trunk to human | V |   |
| 8/24/15 | 8:49  | Sally   | Trunk to hand | Trunk to human | G | E |
| 8/24/15 | 8:51  | Mashudu | Trunk to foot | Trunk to human | V |   |
| 8/24/15 | 9:14  | Thato   | Face          | Other          | V |   |
| 8/24/15 | 14:16 | Thato   | Trunk out     | Trunk out      | G | C |
| 8/24/15 | 14:55 | Sally   | Trunk to leg  | Trunk to human | G | F |
| 8/24/15 | 15:30 | Nandi   | Trunk out     | Trunk out      | G | E |
| 8/25/15 | 13:29 | Shungu  | Trunk out     | Trunk out      | T |   |
| 8/25/15 | 14:10 | Keisha  | Approach      | Seeking out    | G | E |
| 8/25/15 | 14:27 | Shungu  | Approach      | Seeking out    | G | E |
| 8/25/15 | 14:27 | Shungu  | Trunk out     | Trunk out      | G | E |
| 8/26/25 | 9:55  | Nandi   | Approach      | Seeking out    | G | H |
| 8/26/15 | 10:05 | Mashudu | Trunk out     | Trunk out      | G | E |
| 8/26/05 | 10:05 | Mashudu | Trunk out     | Trunk out      | G | F |
| 8/26/95 | 10:06 | Mashudu | Trunk out     | Trunk out      | G | E |
| 8/26/85 | 10:23 | Thandi  | Trunk out     | Trunk out      | G | H |
| 8/26/75 | 10:25 | Shungu  | Approach      | Seeking out    | G | E |
| 8/26/65 | 10:25 | Shungu  | Trunk out     | Trunk out      | G | E |
| 8/26/55 | 10:27 | Shungu  | Approach      | Seeking out    | G | L |
| 8/26/45 | 10:27 | Shungu  | Trunk out     | Trunk out      | G | L |
| 8/26/35 | 10:48 | Thandi  | Trunk to body | Trunk to human | G | E |
| 8/26/25 | 10:48 | Nandi   | Trunk to body | Trunk to human | G | E |

|         |       |         |                         |                   |   |   |
|---------|-------|---------|-------------------------|-------------------|---|---|
| 8/26/15 | 10:55 | Shungu  | Trunk out               | Trunk out         | G | H |
| 8/26/05 | 10:57 | Keisha  | Trunk to hand           | Trunk to human    | G | F |
| 8/26/15 | 10:59 | Nandi   | Trunk to hand           | Trunk to human    | G | H |
| 8/26/25 | 10:59 | Mashudu | Trunk to hand           | Trunk to human    | T |   |
| 8/26/15 | 11:23 | Thandi  | Approach                | Seeking out       | G | H |
| 8/26/25 | 11:23 | Thandi  | Trunk to leg            | Trunk to human    | G | H |
| 8/26/15 | 11:24 | Sally   | Trunk out               | Trunk out         | G | I |
| 8/26/25 | 11:54 | Sally   | Trunk to hand           | Trunk to human    | G | I |
| 8/26/15 | 11:55 | Nandi   | Trunk out               | Trunk out         | G | H |
| 8/26/25 | 12:08 | Thato   | Trunk to hand           | Trunk to human    | T |   |
| 8/26/15 | 12:17 | Shungu  | Trunk out               | Trunk out         | T |   |
| 8/26/25 | 12:17 | Shungu  | Trunk out               | Trunk out         | G | I |
| 8/26/15 | 12:19 | Keisha  | Trunk to hand           | Trunk to human    | G | I |
| 8/26/25 | 12:24 | Mashudu | Trunk out               | Trunk out         | G | I |
| 8/26/15 | 12:25 | Mashudu | Trunk out               | Trunk out         | G | I |
| 8/26/25 | 12:26 | Mashudu | Approach                | Seeking out       | G | Y |
| 8/26/15 | 12:26 | Mashudu | Trunk out               | Trunk out         | G | Y |
| 8/26/15 | 12:27 | Shungu  | Trunk to hand           | Trunk to human    | V |   |
| 8/26/25 | 12:27 | Shungu  | Trunk to hand           | Trunk to human    | V |   |
| 8/26/15 | 12:32 | Nandi   | Trunk out               | Trunk out         | G | I |
| 8/26/25 | 12:45 | Nandi   | Trunk to leg            | Trunk to human    | G | H |
| 8/26/15 | 14:57 | Keisha  | Trunk to hand           | Trunk to human    | G | F |
| 8/26/25 | 15:25 | Thato   | Trunk to hand           | Trunk to human    | T |   |
| 8/26/15 | 15:49 | Mashudu | Approach                | Seeking out       | G | M |
| 8/27/15 | 8:45  | Sally   | Trunk to body           | Trunk to human    | V |   |
| 8/27/15 | 9:04  | Keisha  | Trunk out               | Trunk out         | T |   |
| 8/27/15 | 13:24 | Shungu  | Trunk to hand prolonged | Prolonged contact | V |   |
| 8/27/15 | 13:48 | Shungu  | Approach                | Seeking out       | G | F |
| 8/27/15 | 14:08 | Mashudu | Trunk out               | Trunk out         | G | F |

|         |       |         |                         |                   |   |   |
|---------|-------|---------|-------------------------|-------------------|---|---|
| 8/27/15 | 14:17 | Shungu  | Trunk to hand prolonged | Prolonged contact | V |   |
| 8/27/15 | 14:17 | Shungu  | Trunk to foot           | Trunk to human    | G | I |
| 8/27/15 | 14:17 | Shungu  | Trunk to hand prolonged | Prolonged contact | G | I |
| 8/27/15 | 14:17 | Shungu  | Trunk out               | Trunk out         | V |   |
| 8/27/15 | 14:39 | Shungu  | Approach                | Seeking out       | V |   |
| 8/27/15 | 14:39 | Shungu  | Trunk out               | Trunk out         | V |   |
| 8/27/15 | 14:54 | Thandi  | Trunk to body           | Trunk to human    | G | H |
| 8/27/15 | 14:55 | Shungu  | Trunk out               | Trunk out         | G | E |
| 8/27/15 | 14:56 | Keisha  | Trunk out               | Trunk out         | G | H |
| 8/28/15 | 11:26 | Mashudu | Trunk out               | Trunk out         | G | F |
| 8/28/15 | 11:30 | Keisha  | Trunk out               | Trunk out         | T |   |
| 8/28/15 | 11:30 | Keisha  | Trunk out               | Trunk out         | T |   |
| 8/28/15 | 11:30 | Keisha  | Trunk out               | Trunk out         | G | B |
| 8/28/15 | 11:32 | Shungu  | Trunk out               | Trunk out         | G | B |
| 8/28/15 | 11:33 | Shungu  | Trunk to personal item  | Trunk to object   | T |   |
| 8/28/15 | 11:33 | Shungu  | Trunk out               | Trunk out         | T |   |
| 8/28/15 | 11:33 | Shungu  | Trunk to body           | Trunk to human    | G | B |
| 8/28/15 | 11:40 | Shungu  | Trunk to body           | Trunk to human    | G | B |
| 8/28/15 | 11:40 | Shungu  | Trunk to body           | Trunk to human    | G | B |
| 8/28/15 | 11:54 | Nandi   | Approach                | Seeking out       | G | F |
| 8/28/15 | 11:54 | Nandi   | Trunk to bullhook       | Trunk to object   | G | F |
| 8/28/15 | 11:54 | Nandi   | Trunk to hand           | Trunk to human    | G | I |
| 8/28/15 | 11:55 | Shungu  | Trunk to bullhook       | Trunk to object   | G | J |
| 8/28/15 | 11:58 | Thato   | Approach                | Seeking out       | G | F |
| 8/28/15 | 12:00 | Thato   | Trunk out               | Trunk out         | G | J |
| 8/28/15 | 12:21 | Sally   | Trunk to foot           | Trunk to human    | T |   |
| 8/28/15 | 12:55 | Keisha  | Trunk to hand           | Trunk to human    | G | I |
| 8/28/15 | 12:55 | Keisha  | Trunk to body           | Trunk to human    | G | I |
| 8/28/15 | 12:55 | Keisha  | Trunk to hand           | Trunk to human    | G | I |

|         |       |         |                        |                 |   |   |
|---------|-------|---------|------------------------|-----------------|---|---|
| 8/28/15 | 13:01 | Keisha  | Trunk to hand          | Trunk to human  | V |   |
| 8/28/15 | 13:01 | Keisha  | Trunk to body          | Trunk to human  | G | I |
| 8/28/15 | 13:01 | Keisha  | Trunk to hand          | Trunk to human  | G | I |
| 8/28/15 | 13:01 | Keisha  | Trunk to personal item | Trunk to object | V |   |
| 8/28/15 | 16:36 | Thato   | Trunk to hand          | Trunk to human  | G | L |
| 8/29/15 | 9:26  | Nandi   | Trunk out              | Trunk out       | G | I |
| 8/29/15 | 9:26  | Shungu  | Approach               | Seeking out     | G | D |
| 8/29/15 | 9:27  | Shungu  | Turn body              | Other           | G | I |
| 8/29/15 | 9:27  | Thandi  | Trunk out              | Trunk out       | G | I |
| 8/29/15 | 9:28  | Thandi  | Trunk to body          | Trunk to human  | G | I |
| 8/29/15 | 9:28  | Thandi  | Trunk out              | Trunk out       | G | I |
| 8/29/15 | 9:37  | Shungu  | Follow                 | Seeking out     | G | E |
| 8/29/15 | 9:54  | Sally   | Trunk to hand          | Trunk to human  | T |   |
| 8/29/15 | 10:56 | Thandi  | Approach               | Seeking out     | G | K |
| 8/29/15 | 11:20 | Shungu  | Trunk to body          | Trunk to human  | G | H |
| 8/29/15 | 11:25 | Mashudu | Trunk to hand          | Trunk to human  | G | D |
| 8/29/15 | 11:28 | Mashudu | Trunk to body          | Trunk to human  | V |   |
| 8/29/15 | 11:28 | Mashudu | Trunk to hand          | Trunk to human  | V |   |
| 8/29/15 | 11:31 | Mashudu | Trunk to hand          | Trunk to human  | V |   |
| 8/29/15 | 11:45 | Thandi  | Trunk to hand          | Trunk to human  | G | H |
| 8/29/15 | 12:59 | Keisha  | Trunk to foot          | Trunk to human  | G | D |
| 8/29/15 | 13:58 | Keisha  | Trunk out              | Trunk out       | T |   |
| 8/29/15 | 14:03 | Mashudu | Trunk to hand          | Trunk to human  | V |   |
| 8/29/15 | 14:03 | Mashudu | Follow                 | Seeking out     | G | I |
| 8/29/15 | 14:03 | Mashudu | Trunk to hand          | Trunk to human  | V |   |
| 8/29/15 | 14:11 | Sally   | Trunk to body          | Trunk to human  | G | E |
| 8/29/15 | 14:17 | Thandi  | Trunk to body          | Trunk to human  | T |   |
| 8/29/15 | 14:29 | Shungu  | Trunk to hand          | Trunk to human  | G | E |
| 8/29/15 | 14:29 | Shungu  | Trunk to hand          | Trunk to human  | T |   |

|         |       |         |                        |                 |   |   |
|---------|-------|---------|------------------------|-----------------|---|---|
| 8/29/15 | 15:20 | Shungu  | Trunk to hand          | Trunk to human  | T |   |
| 8/29/15 | 15:45 | Thato   | Approach               | Seeking out     | G | L |
| 8/29/15 | 15:45 | Thato   | Trunk out              | Trunk out       | G | L |
| 8/29/15 | 15:46 | Nandi   | Trunk to foot          | Trunk to human  | G | J |
| 8/29/15 | 15:47 | Thato   | Trunk to body          | Trunk to human  | G | H |
| 8/29/15 | 15:56 | Keisha  | Trunk to personal item | Trunk to object | T |   |
| 8/29/15 | 15:56 | Sally   | Trunk to foot          | Trunk to human  | T |   |
| 8/29/15 | 16:20 | Sally   | Approach               | Seeking out     | G | D |
| 8/30/15 | 11:55 | Keisha  | Trunk to body          | Trunk to human  | T |   |
| 8/30/15 | 12:31 | Shungu  | Trunk to hand          | Trunk to human  | V |   |
| 8/30/15 | 12:45 | Thandi  | Trunk to hand          | Trunk to human  | V |   |
| 8/30/15 | 12:45 | Thandi  | Trunk to body          | Trunk to human  | G | H |
| 8/30/15 | 12:45 | Thandi  | Trunk out              | Trunk out       | V |   |
| 8/31/15 | 9:26  | Keisha  | Trunk out              | Trunk out       | T |   |
| 8/31/15 | 9:35  | Shungu  | Trunk to hand          | Trunk to human  | V |   |
| 8/31/15 | 9:57  | Nandi   | Trunk out              | Trunk out       | G | E |
| 8/31/15 | 10:53 | Shungu  | Trunk out              | Trunk out       | V |   |
| 8/31/15 | 10:53 | Sally   | Trunk out              | Trunk out       | T |   |
| 8/31/15 | 10:56 | Nandi   | Approach               | Seeking out     | G | E |
| 8/31/15 | 10:56 | Nandi   | Trunk out              | Trunk out       | G | E |
| 8/31/15 | 11:04 | Thandi  | Approach               | Seeking out     | G | E |
| 9/2/15  | 12:39 | Mashudu | Trunk out              | Trunk out       | G | I |
| 9/2/15  | 12:39 | Mashudu | Trunk out              | Trunk out       | G | I |
| 9/2/15  | 13:08 | Keisha  | Trunk to hand          | Trunk to human  | G | Y |
| 9/2/15  | 13:08 | Keisha  | Trunk to body          | Trunk to human  | G | Y |
| 9/2/15  | 13:08 | Keisha  | Trunk out              | Trunk out       | G | Y |
| 9/2/15  | 13:08 | Keisha  | Trunk out              | Trunk out       | G | Y |
| 9/2/15  | 14:02 | Shungu  | Trunk to hand          | Trunk to human  | V |   |
| 9/2/15  | 14:02 | Shungu  | Trunk to hand          | Trunk to human  | V |   |

|        |       |         |                        |                 |   |   |
|--------|-------|---------|------------------------|-----------------|---|---|
| 9/2/15 | 14:02 | Shungu  | Trunk to hand          | Trunk to human  | V |   |
| 9/2/15 | 14:02 | Shungu  | Trunk to leg           | Trunk to human  | V |   |
| 9/2/15 | 14:04 | Keisha  | Trunk to body          | Trunk to human  | T |   |
| 9/2/15 | 14:16 | Shungu  | Trunk to hand          | Trunk to human  | V |   |
| 9/3/15 | 9:27  | Sally   | Trunk out              | Trunk out       | G | H |
| 9/3/15 | 9:30  | Sally   | Head-to                | Other           | G | H |
| 9/3/15 | 10:26 | Shungu  | Trunk to hand          | Trunk to human  | G | E |
| 9/3/15 | 10:26 | Shungu  | Follow                 | Seeking out     | G | E |
| 9/3/15 | 10:26 | Shungu  | Trunk to leg           | Trunk to human  | G | E |
| 9/3/15 | 10:28 | Thandi  | Trunk to bullhook      | Trunk to object | G | J |
| 9/3/15 | 10:41 | Sally   | Trunk to leg           | Trunk to human  | T |   |
| 9/3/15 | 10:41 | Sally   | Trunk to body          | Trunk to human  | T |   |
| 9/3/15 | 10:42 | Sally   | Trunk to personal item | Trunk to object | T |   |
| 9/4/15 | 10:27 | Keisha  | Trunk out              | Trunk out       | G | E |
| 9/4/15 | 10:27 | Keisha  | Trunk out              | Trunk out       | G | A |
| 9/4/15 | 11:24 | Nandi   | Approach               | Seeking out     | G | A |
| 9/4/15 | 11:25 | Sally   | Trunk to foot          | Trunk to human  | G | Y |
| 9/4/15 | 11:25 | Sally   | Trunk to leg           | Trunk to human  | G | Y |
| 9/4/15 | 11:27 | Sally   | Trunk out              | Trunk out       | T |   |
| 9/4/15 | 13:23 | Mashudu | Trunk out              | Trunk out       | T |   |
| 9/4/15 | 13:24 | Shungu  | Trunk to hand          | Trunk to human  | V |   |
| 9/4/15 | 13:24 | Thato   | Trunk out              | Trunk out       | G | M |
| 9/4/15 | 14:27 | Shungu  | Trunk out              | Trunk out       | G | E |
| 9/4/15 | 14:27 | Shungu  | Trunk to leg           | Trunk to human  | G | E |
| 9/4/15 | 14:32 | Thandi  | Trunk out              | Trunk out       | G | E |
| 9/4/15 | 14:37 | Mashudu | Approach               | Seeking out     | V |   |
| 9/4/15 | 14:37 | Mashudu | Trunk to body          | Trunk to human  | V |   |
| 9/4/15 | 15:00 | Shungu  | Trunk to hand          | Trunk to human  | V |   |
| 9/5/15 | 10:26 | Shungu  | Trunk out              | Trunk out       | G | M |

|        |       |        |                        |                 |   |   |
|--------|-------|--------|------------------------|-----------------|---|---|
| 9/5/15 | 10:26 | Shungu | Trunk out              | Trunk out       | T |   |
| 9/5/15 | 10:28 | Shungu | Trunk out              | Trunk out       | T |   |
| 9/5/15 | 10:33 | Keisha | Approach               | Seeking out     | G | K |
| 9/5/15 | 10:38 | Nandi  | Face                   | Other           | G | D |
| 9/5/15 | 10:38 | Nandi  | Trunk out              | Trunk out       | G | D |
| 9/5/15 | 10:42 | Thato  | Trunk out              | Trunk out       | G | D |
| 9/5/15 | 10:42 | Thato  | Trunk out              | Trunk out       | V |   |
| 9/5/15 | 10:42 | Thato  | Trunk to arm           | Trunk to human  | V |   |
| 9/5/15 | 11:05 | Shungu | Trunk to hand          | Trunk to human  | G | D |
| 9/5/15 | 11:07 | Nandi  | Trunk out              | Trunk out       | G | D |
| 9/5/15 | 11:14 | Nandi  | Trunk to arm           | Trunk to human  | G | I |
| 9/5/15 | 11:14 | Nandi  | Trunk to bullhook      | Trunk to object | G | I |
| 9/5/15 | 11:35 | Thato  | Trunk to hand          | Trunk to human  | G | I |
| 9/5/15 | 11:35 | Thato  | Trunk to hand          | Trunk to human  | G | I |
| 9/5/15 | 11:45 | Shungu | Trunk out              | Trunk out       | G | A |
| 9/5/15 | 13:26 | Sally  | Trunk to leg           | Trunk to human  | G | E |
| 9/5/15 | 13:27 | Sally  | Trunk out              | Trunk out       | G | E |
| 9/5/15 | 13:27 | Sally  | Trunk to bullhook      | Trunk to object | G | E |
| 9/5/15 | 13:29 | Sally  | Trunk to leg           | Trunk to human  | G | E |
| 9/5/15 | 13:29 | Sally  | Trunk out              | Trunk out       | G | E |
| 9/5/15 | 13:30 | Keisha | Trunk out              | Trunk out       | T |   |
| 9/5/15 | 13:44 | Thandi | Trunk to personal item | Trunk to object | V |   |
| 9/5/15 | 13:44 | Thandi | Trunk to hand          | Trunk to human  | V |   |
| 9/5/15 | 14:27 | Shungu | Trunk out              | Trunk out       | G | E |
| 9/5/15 | 14:28 | Shungu | Trunk out              | Trunk out       | G | E |
| 9/5/15 | 14:29 | Shungu | Trunk to hand          | Trunk to human  | V |   |
| 9/5/15 | 14:29 | Shungu | Trunk to hand          | Trunk to human  | V |   |
| 9/5/15 | 14:29 | Shungu | Trunk to body          | Trunk to human  | V |   |
| 9/5/15 | 14:29 | Shungu | Trunk out              | Trunk out       | G | E |

|        |       |        |                        |                 |   |   |
|--------|-------|--------|------------------------|-----------------|---|---|
| 9/5/15 | 14:37 | Thato  | Trunk to personal item | Trunk to object | V |   |
| 9/5/15 | 14:37 | Thato  | Trunk to hand          | Trunk to human  | V |   |
| 9/5/15 | 14:46 | Sally  | Trunk to leg           | Trunk to human  | V |   |
| 9/5/15 | 15:06 | Keisha | Trunk out              | Trunk out       | G | C |
| 9/5/15 | 15:07 | Keisha | Trunk to leg           | Trunk to human  | G | D |
| 9/5/15 | 15:43 | Nandi  | Trunk to hand          | Trunk to human  | V |   |
